# Supplementary material
Source: Royal Society of Chemistry journal article supplement (https://www.rsc.org/suppdata/dt/1998/609/b706110.doc)
Supplement: Supplementary file 1 [file b706110.doc]

Copyright The Royal Society of Chemistry, 1998

Supporting Information

Spectroscopic and electrochemical studies of a series of copper(I) and rhenium(I) complexes with substituted dipyrido[3,2-a:2/,3/-c]phenazine ligands.

Mark R. Waterland, Keith C. Gordon*
Chemistry Department, University of Otago, P. O. Box 56, Dunedin, New Zealand

John J. McGarvey* and  Pradeep M. Jayaweera
School of Chemistry, The Queen's University of Belfast, David Keir Building, Belfast BT9 5AG, Northern Ireland.


únÿúnÿúnÿúnÿúnÿ£únÿ©únÿ®úÿ´ú¸ÿ¿úøÿÄú8ÉúÏú·Úúçßúåú6êúQõúaúúqûûûû¦û« û¶+û»1ûÆ6ûË<ûÖFûÛLûàQûëWûëbûëgûðlûðrûðûëûåûåûåûàûà£ûÛ¨ûÖ®ûÐ¹ûË¾ûÆÃû»Éû¶Ôû°Ùû¦ßû¦äûïûôûúûÿûüüüüv%üq+ük0üa5üa@üVFüVKüQQüQ[üLaüLfüQlüwü|üaüküqüvüü¢ü­ü²ü¸ü½üÈüÎüÓüØüÞü¦éü°îü»ôüËùüàýõ	ýýý*ý:$ýJ*ýU/ýe:ýo@ýzEýKýUý[ý`ýfýqývýý¤ýªýªýªýªý¯§ý¯¬ý¯²ý¯·ý¯Âý¯Çý¯Íý¯Òý¯Ýý¯ãý¯èý´íý¯øý´þý´þ´	þ´þ´þ´þ´$þ´)þ´4þ´:þ´?þ´Dþ´Oþ´Uþ´Zþ´`þ´jþºpþºuþºþ´þºþºþºþº¡þº¦þº¬þº±þº¼þºÁþºÇþºÌþº×þºÝþºâþºçþºòþºøþºýþºÿ¿ÿºÿºÿºÿº)ÿº.ÿº3ÿº9ÿº>ÿºIÿ¿OÿºTÿ¿Yÿ¿dÿ¿jÿ¿oÿ¿uÿ¿ÿ¿ÿ¿ÿ¿ÿ¿ÿ¿ ÿ¿¦ÿ¿«ÿ¿¶ÿ¿»ÿ¿Áÿ¿ÆÿÄÑÿ¿ÖÿÄÜÿÄáÿÄìÿÄòÿ¿÷ÿÄüÿÄÄ¿ÄÄ"Ä(Ä-Ä3Ä>¿C¿H¿NÄYÄ^¿d¿iÄoÄyÄÄÄÄÄÄÄ¥Ä°ÄµÄ»ÄÀÄËÄÐÄÖÄÛÄæÄëÄñÄöÄÄÄÄÄÄ"Ä'Ä-Ä8Ä=ÄBÄHÄSÄXÄ^ÄcÄnÄsÄyÄ~ÄÄÄÄÄÄªÄ¯Ä´ÄºÄÅÄÊÄÐÄÕÄàÄåÄëÄðÄûÄÄÄÄÄÄ!Ä'Ä1Ä7Ä<ÄBÄMÄRÄWÄ]ÄhÄmÄsÄxÄÄÄÄÄÄ£Ä©Ä®Ä¹Ä¿ÄÄÄÊÄÏÄÚÄßÄåÄêÄõÄúÄÄÄÄÄÄ Ä+Ä1Ä6Ä<ÄFÄLÄQÄWÄbÄgÄlÄrÄÄÄÄÄÄÄ£Ä¨Ä³Ä¹Ä¾ÄÃÄÎÄÔÄÙÄßÄéÄïÄôÄúÄÿÄÄÄÄÄ%Ä+Ä0Ä6Ä@ÄFÄKÄQÄÄaÄfÄlÄwÄ|ÄÄÄÄÄÄ¢Ä­Ä²Ä¸Ä½ÄÈÄÎÄÓÄØÄãÊéÄîÄôÄÿÄÄ	ÄÄÄÄ%Ä*Ä/Ä:Ä@ÄEÄKÄUÄ[Ä`ÄfÄqÄvÄÄÄÄÄÄÄ§Ä¬Ä²Ä·ÄÂÄÈÄÍÄÒÄÝÄãÄèÄîÄøÄþÄÄ	ÄÄÄÄ$Ê/Ä4Ä:Ä?ÄJÄOÄUÄ%Ãsúnÿxúnÿúnÿúnÿúnÿúnÿúnÿ£úsÿ©ú~ÿ®ú£ÿ´úÎÿ¿úÄúBÉúwÏú¬Úú×ßú÷åúêú1õúAúúQûûkûvûvû û+û1û6û<û¦Fû«Lû«Qû°Wû¶bû°gû¶lû¶rû»û¶û«û°û°û«û«£û¦¨û¡®û¡¹û¾ûÃûÉûÔûÙûßûväûvïûqôûkúûfÿûfüfüfüfüa%üa+ü0üV5üV@üQFüQKüQQüQ[üQaüVfülüwüf|üküqüüüü¢ü­ü²ü¸ü½üÈüÎüÓüØüÞü¡éü¦îü¶ôüÆùüÐýà	ýðýýý$ý%*ý0/ý::ýE@ýJEýPKýUUýZ[ýZ`ý`fýeqýevýeýjýoýoýoýuýu§ýz¬ýz²ýz·ýÂýÇýÍýÒýÝýãýèýíýøýþýþ	þþþþ$þ)þ4þ:þ?þDþOþUþZþ`þjþpþuþþþþþþ¡þ¦þ¬þ±þ¼þÁþÇþÌþ×þÝþâþçþòþøþýþÿÿÿÿÿ)ÿ.ÿ3ÿ9ÿ>ÿIÿOÿTÿYÿdÿjÿoÿuÿÿÿÿÿÿ ÿ¦ÿ«ÿ¶ÿ»ÿÁÿÆÿÑÿÖÿÜÿáÿìÿòÿ÷ÿüÿ"(-3>CHNY^dioy¤¤¤¤¤ªª¥ª°ªµª»ªÀ¯Ë¯Ð¯Ö¯Û¯æ¯ë¯ñ¯ö¯¯¯´¯´"´'´-´8´=´B´H´S´X´^´c´n´s´y´~´´´´´´ª´¯º´ºº´ÅºÊ´Ð´Õ´àºåºë´ð´û´´ºººº!º'º1º7´<ºBºMºRºWº]ºhºmºsºxºººººº£º©º®º¹º¿ºÄºÊºÏºÚºßºåºêºõºúºººººº ´+º1º6º<ºF´LºQºWºbºgºlºrººººººº£º¨º³º¹º¾´ÃºÎºÔ´Ùºßºé´ïºô´úºÿºººº´%º+º0º6º@ºF´KºQ´ºaºfºlºwº|ºººº´´¢º­º²´¸º½ºÈºÎºÓºØºãºéºîºôºÿºº	ºººº%º*º/º:º@ºEºKºUº[º`ºfºqºvººººººº§º¬º²º·ºÂºÈºÍºÒºÝºãºèºî¿øºþºº	ºººº$º/º4¿:º?ºJºOºU¿%Ãsúnÿxúsÿú~ÿúÿúÿúÿúÿ£úÿ©ú®ÿ®úÎÿ´úýÿ¿ú#ÄúXÉúÏú·Úú×ßúåúêú6õúAúúLûVûfûkûvû û+û1û6û<ûFû¡Lû¡Qû¡Wû¡bû¡gû¡lû¦rû¦û¡ûûûûû£û¨û®û¹û¾ûÃûÉûvÔûvÙûqßûfäûfïûfôûfúûaÿûaüfüaüaüa%üf+üa0üa5ü@üFüKüfQüa[üaükfüklükwüv|üüüüüü¢ü­ü²ü¸ü½üÈüÎüÓüØü¡Þü«éü°îü»ôüÆùüÖýà	ýëýûýý$ý*ý /ý%:ý0@ý0Eý5Ký:Uý:[ý@`ý@fýEqýEvýEýJýJýPýPýUýZ§ýZ¬ý`²ý`·ýeÂýeÇýjÍýjÒýoÝýoãýuèýuíýzøýzþýzþz	þzþzþzþ$þ)þ4þ:þ?þDþOþUþZþ`þjþpþuþþþþþþ¡þ¦þ¬þ±þ¼þÁþÇþÌþ×þÝþâþçþòþøþýþÿÿÿÿÿ)ÿz.ÿz3ÿz9ÿz>ÿzIÿzOÿzTÿzYÿzdÿjÿoÿuÿÿÿÿÿÿ ÿ¦ÿ«ÿ¶ÿ»ÿÁÿÆÿÑÿÖÿÜÿáÿìÿòÿ÷ÿüÿ"(-3>CHNY^dioy¤¤¥¤°ªµª»ªÀªËªÐ¯Ö¯Û¯æ¯ë¯ñ¯ö¯¯¯¯´´"´'´-´8´=´B´H´S´X´^´c´n´s´y´~´´´´´´ª´¯´´´º´Å´Ê´ÐºÕ´àºåºë´ð´û´ººººº!º'º1º7´<´B´MºRºWº]ºhºmºsºxººººº´£º©´®´¹´¿´Ä´Ê´Ï´Úºß´å´ê´õ´ú´´´´´´ ´+´1´6´<´F´L´Q´W´b´g´l´r´´´´´´´£´¨´³´¹´¾´Ã´Î´Ô´Ù´ß´é´ï´ô´ú´ÿ´´´´¯%´+¯0´6´@´F´K´Q´´a´f´l´w´|´´´´¯´¢´­´²´¸´½´È´Î´Ó´Ø´ã´é´î´ô´ÿ´´	´´´´%´*´/´:´@´E´K´U´[´`´f´q´v´´´´´´´§´¬´²´·´Â´È´Í´Ò´Ý´ã´è´îºøºþ´º	´ººº$º/º4º:º?ºJºOºUº%Ãsú2xú=ú=úHúMúRú]£úb©úh®úw´ú¿ú¢Äú²ÉúÇÏúÜÚúìßúåúêú'õú,úú1û<ûLûQûQûV û+ûV1û6û<ûaFûLûQûWûbûVgûVlûVrûQûQûLûLûLûFûF£ûA¨ûA®û<¹ûA¾û<Ãû6Éû6Ôû6Ùû1ßû1äû6ïû6ôû<úûAÿûFüQüüaük%üv+ü0ü5ü@üFü¡Kü«Qü°[ü¶aü»füÆlüÐwüÐ|üÖüÖüÛüÛüÖüÖ¢üÐ­üË²üÐ¸üË½üÆÈüÆÎüÆÓüËØüËÞüËéüËîüÐôüÐùüÐýÖ	ýÐýÐýÐýÐ$ýÐ*ýË/ýË:ýÆ@ýÀEýÀKýÀUý»[ý¶`ý¶fý¶qý¶vý¶ý¶ý»ýÀýÀýËýÐ§ýÛ¬ýà²ýë·ýõÂýûÇýÍýÒýÝýãýèý íý%øý*þý*þ0	þ5þ5þ5þ:$þ:)þ:4þ@:þ@?þ@Dþ@Oþ:Uþ@Zþ@`þ@jþ:pþ:uþ:þ:þ:þ:þ:þ:¡þ:¦þ:¬þ:±þ:¼þ:Áþ@Çþ:Ìþ:×þ@Ýþ:âþ:çþ:òþ:øþ5ýþ5ÿ5ÿ5ÿ0ÿ0ÿ*)ÿ*.ÿ*3ÿ%9ÿ%>ÿ%Iÿ%Oÿ%Tÿ%Yÿ%dÿ%jÿ*oÿ*uÿ0ÿ0ÿ5ÿ5ÿ:ÿ: ÿ@¦ÿE«ÿE¶ÿE»ÿJÁÿJÆÿJÑÿJÖÿJÜÿJáÿJìÿJòÿE÷ÿJüÿEEEEE"E(E-J3J>JCPHPNUYZ^Zd`ijooyuz¥°µ»¤À¤ËªÐªÖ¯Û¯æ¯ë´ñ´ö´´ºººº"º'º-º8º=ºBºHºSºXº^ºcºnºsºyº~ººººººªº¯º´ºººÅºÊºÐºÕºàºåºëºðºûºººººº!º'º1´7´<´B´M´R´W´]´h´m´s´x´´´´´¯£¯©¯®¯¹¯¿¯Ä¯Ê¯Ï¯Ú¯ßªå¯ê¯õªú¯ªªªªª ª+ª1ª6ª<¤F¤L¤Q¤W¤b¤g¤l¤r¤¤¤¤¤¤£¨³¹¾ÃÎÔÙßéïôúÿ%+06@FKQaflw|¢­²¸½ÈÎÓØãéîôÿ	%*/:@EK¤U[`¤f¤q¤v¤¤¤¤¤¤§¤¬¤²¤·¤Â¤È¤Í¤Ò¤Ý¤ã¤è¤îªøªþ¤ª	¤ªªª$ª/¯4ª:ª?¯J¯O¯Uª%ÃsúÃÿxúÃÿúÎÿúÞÿúãÿúãÿúèÿ£úíÿ©úýÿ®ú´ú8¿ú]ÄúÉú²Ïú×Úúñßúåú,êú<õúFúúQûûkûqûvû û+û1û6û<ûFûLûQûWûbûgûlûrûûûûûûû£û¨û®û¹û¾ûÃûqÉûkÔûkÙûkßûfäûfïûaôûfúûfÿûfüküküküq%üv+üv0ü5ü@üFüKüQü[üaüfülüwü¡|ü¦ü°ü°ü¶ü°ü°¢ü°­ü°²ü¶¸ü°½ü°Èü¶Îü°Óü¶Øü»ÞüÀéüÆîüÐôüÖùüàýë	ýðýûýý$ý*ý/ý:ý@ýEýKý Uý [ý`ý fý qý%vý%ý%ý*ý0ý0ý5ý:§ý@¬ýE²ýJ·ýPÂýUÇýUÍýZÒýZÝý`ãýeèýeíýjøýjþýjþo	þoþuþuþu$þu)þu4þz:þu?þzDþzOþzUþzZþz`þzjþzpþuuþzþuþzþzþzþz¡þz¦þz¬þz±þz¼þzÁþzÇþzÌþz×þzÝþzâþzçþzòþzøþuýþuÿuÿuÿuÿoÿo)ÿo.ÿo3ÿo9ÿj>ÿjIÿjOÿoTÿoYÿodÿojÿooÿouÿuÿuÿuÿzÿzÿz ÿ¦ÿ«ÿ¶ÿ»ÿÁÿÆÿÑÿÖÿÜÿáÿìÿòÿ÷ÿüÿ"(-3>CHNY^dioy¤¤ªª¥¯°¯µ¯»´À´ËºÐºÖºÛºæ¿ë¿ñ¿ö¿¿¿¿¿Ä"Ä'¿-Ä8Ä=ÄBÄHÄSÄXÄ^ÄcÄnÄsÄyÄ~ÄÄÄÄÄÄªÄ¯Ä´ÄºÄÅÄÊÄÐÄÕÄàÄåÄëÄðÄûÄÄÄÄÄÄ!Ä'Ä1Ä7Ä<ÄBÄMÄRÄWÄ]ÄhÄmÄsÄxÄÄÄÄÄÄ£Ä©Ä®Ä¹Ä¿ÄÄ¿Ê¿ÏÄÚ¿ß¿å¿ê¿õ¿ú¿¿¿¿¿¿ ¿+¿1¿6¿<¿F¿L¿Q¿W¿b¿g¿l¿rº¿¿ºº¿º£º¨º³º¹º¾ºÃºÎºÔºÙºßºéºïºôºúºÿººººº%º+º0º6º@ºFºKºQººaºfºlºwº|ºººººº¢º­º²º¸º½ºÈºÎºÓºØºã¿éºîºôºÿºº	ºººº%¿*¿/º:º@ºE¿K¿Uº[¿`¿f¿q¿v¿¿¿¿¿¿¿§¿¬¿²¿·¿Â¿È¿Í¿Ò¿Ý¿ã¿è¿î¿ø¿þ¿¿	¿ÄÄÄ$Ä/Ä4Ä:¿?ÄJÄOÄUÄ	ÿÿÿûqÿ"Helvetica-Narrow;-	ú"-ÚmúiÿmúÔmúÔú!0Êùâmúâú!2ÊùÚmúÚZiÿZiÿmúÚmú'ÿÿð&TNPP--'ÿÿ&ÿÿÿÿ&ÿÿÿÿz÷.øt?--?t.øz÷&TNPP.	ÿÿÿ--üÿÿÿ-	ú"-	%Ãsúþxú+þú;þúKþú[þúkþúþ£úþ©ú þ®ú°þ´úºþ¿úÀþÄúÊþÉúÐþÏúÕþÚúÚþßúàþåúêþêúðþõúðþúúðþûõþûÿþûÿûÿûÿ ûÿ+ûÿ1ûÿ6ûÿ<ûÿFûÿLûÿQûÿWûÿþbûÿþgûúþlûúþrûõþûõþûðþûêþûåþûàþûÚþ£ûÕþ¨ûÐþ®ûÊþ¹ûÊþ¾ûÅþÃûÀþÉûºþÔû°þÙû°þßû«þäû«þïû¥þôû þúûþÿûþüþükþüfþü`þ%ü`þ+ü`þ0üfþ5ükþ@üpþFüpþKüuþQüuþ[üþaüþfüþlüþwüþ|üþüuþüfþüKþü;þü6þ¢ü6þ­üFþ²üVþ¸üpþ½üþÈü«þÎüÅþÓüÚþØüõþÞüÿéüÿîü%ÿôü/ÿùü?ÿýDÿ	ýOÿýOÿýTÿýZÿ$ýZÿ*ý_ÿ/ý_ÿ:ý_ÿ@ýdÿEýdÿKýdÿUýdÿ[ýdÿ`ýdÿfýdÿqýdÿvýdÿýdÿýdÿýdÿýdÿýdÿýdÿ§ýdÿ¬ýdÿ²ýdÿ·ýdÿÂýdÿÇýdÿÍýdÿÒýdÿÝýdÿãýdÿèýdÿíýdÿøýdÿþýdÿþdÿ	þdÿþdÿþdÿþdÿ$þdÿ)þdÿ4þdÿ:þdÿ?þdÿDþdÿOþdÿUþdÿZþdÿ`þdÿjþdÿpþdÿuþdÿþdÿþdÿþdÿþdÿþdÿ¡þdÿ¦þdÿ¬þdÿ±þdÿ¼þdÿÁþdÿÇþdÿÌþdÿ×þdÿÝþdÿâþdÿçþdÿòþdÿøþdÿýþdÿÿdÿÿdÿÿdÿÿdÿÿdÿ)ÿdÿ.ÿdÿ3ÿdÿ9ÿdÿ>ÿdÿIÿdÿOÿdÿTÿdÿYÿdÿdÿdÿjÿdÿoÿdÿuÿdÿÿdÿÿdÿÿdÿÿdÿÿdÿ ÿdÿ¦ÿdÿ«ÿdÿ¶ÿdÿ»ÿdÿÁÿdÿÆÿdÿÑÿdÿÖÿdÿÜÿdÿáÿdÿìÿdÿòÿdÿ÷ÿdÿüÿdÿdÿdÿdÿdÿ"dÿ(dÿ-dÿ3dÿ>dÿCdÿHdÿNdÿYdÿ^dÿddÿidÿodÿydÿdÿdÿdÿdÿdÿdÿ¥dÿ°dÿµdÿ»dÿÀdÿËdÿÐdÿÖdÿÛdÿædÿëdÿñdÿödÿdÿdÿdÿdÿdÿ"dÿ'dÿ-dÿ8dÿ=dÿBdÿHdÿSdÿXdÿ^dÿcdÿndÿsdÿydÿ~dÿdÿdÿdÿdÿdÿªdÿ¯dÿ´dÿºdÿÅdÿÊdÿÐdÿÕdÿàdÿådÿëdÿðdÿûdÿdÿdÿdÿdÿdÿ!dÿ'dÿ1dÿ7dÿ<dÿBdÿMdÿRdÿWdÿ]dÿhdÿmdÿsdÿxdÿdÿdÿdÿdÿdÿ£dÿ©dÿ®dÿ¹dÿ¿dÿÄdÿÊdÿÏdÿÚdÿßdÿådÿêdÿõdÿúdÿdÿdÿdÿdÿdÿ dÿ+dÿ1dÿ6dÿ<dÿFdÿLdÿQdÿWdÿbdÿgdÿldÿrdÿdÿdÿdÿdÿdÿdÿ£dÿ¨dÿ³dÿ¹dÿ¾dÿÃdÿÎdÿÔdÿÙdÿßdÿédÿïdÿôdÿúdÿÿdÿdÿdÿdÿdÿ%dÿ+dÿ0dÿ6dÿ@dÿFdÿKdÿQdÿdÿadÿfdÿldÿwdÿ|dÿdÿdÿdÿdÿdÿ¢dÿ­dÿ²dÿ¸dÿ½_ÿÈdÿÎdÿÓdÿØdÿãdÿé_ÿî_ÿôdÿÿdÿdÿ	_ÿdÿdÿdÿ%_ÿ*dÿ/dÿ:_ÿ@dÿE_ÿKdÿUdÿ[_ÿ`dÿfdÿq_ÿvdÿdÿdÿdÿ_ÿ_ÿdÿ§_ÿ¬_ÿ²_ÿ·dÿÂdÿÈ_ÿÍdÿÒdÿÝdÿã_ÿèdÿîdÿødÿþdÿdÿ	dÿdÿdÿdÿ$dÿ/dÿ4dÿ:dÿ?dÿJdÿOdÿUdÿ%Ãsúþxúþú&þú6þúFþúVþúkþ£úþ©úþ®úþ´ú¥þ¿úµþÄúºþÉúÅþÏúÊþÚúÕþßúÚþåúàþêúêþõúêþúúêþûõþûÿþûÿûÿûÿ ûÿ+ûÿ1ûÿ6ûÿ<ûÿFûÿLûÿQûÿWûÿþbûÿþgûÿþlûúþrûúþûõþûõþûðþûêþûåþûÚþ£ûÕþ¨ûÕþ®ûÐþ¹ûÊþ¾ûÊþÃûÊþÉûÀþÔûºþÙûµþßûµþäû°þïû°þôû«þúû¥þÿûþüþüþüpþükþ%ükþ+üpþ0üuþ5üþ@üþFüþKüþQüþ[üþaüþfüþlüþwüþ|üþüþüpþü`þüPþüFþ¢üKþ­üVþ²üfþ¸üþ½üþÈüµþÎüÐþÓüåþØüúþÞüÿéüÿîü%ÿôü/ÿùü?ÿýDÿ	ýJÿýOÿýTÿýTÿ$ýZÿ*ýZÿ/ýZÿ:ý_ÿ@ý_ÿEý_ÿKý_ÿUý_ÿ[ýdÿ`ýdÿfýdÿqý_ÿvý_ÿý_ÿý_ÿý_ÿý_ÿý_ÿý_ÿ§ý_ÿ¬ý_ÿ²ý_ÿ·ý_ÿÂý_ÿÇý_ÿÍý_ÿÒý_ÿÝý_ÿãý_ÿèý_ÿíý_ÿøý_ÿþý_ÿþ_ÿ	þ_ÿþ_ÿþ_ÿþdÿ$þdÿ)þ_ÿ4þ_ÿ:þ_ÿ?þdÿDþdÿOþdÿUþdÿZþdÿ`þdÿjþdÿpþdÿuþdÿþdÿþdÿþdÿþdÿþdÿ¡þdÿ¦þdÿ¬þdÿ±þdÿ¼þdÿÁþdÿÇþdÿÌþdÿ×þ_ÿÝþ_ÿâþ_ÿçþ_ÿòþ_ÿøþ_ÿýþ_ÿÿ_ÿÿ_ÿÿ_ÿÿ_ÿÿ_ÿ)ÿ_ÿ.ÿ_ÿ3ÿ_ÿ9ÿdÿ>ÿdÿIÿdÿOÿdÿTÿdÿYÿdÿdÿdÿjÿdÿoÿdÿuÿdÿÿdÿÿdÿÿdÿÿdÿÿdÿ ÿdÿ¦ÿdÿ«ÿdÿ¶ÿ_ÿ»ÿdÿÁÿdÿÆÿ_ÿÑÿdÿÖÿ_ÿÜÿ_ÿáÿdÿìÿ_ÿòÿ_ÿ÷ÿdÿüÿ_ÿ_ÿdÿ_ÿdÿ"dÿ(_ÿ-dÿ3dÿ>dÿCdÿHdÿNdÿYdÿ^dÿddÿidÿodÿydÿ_ÿdÿdÿdÿdÿdÿ¥dÿ°dÿµdÿ»dÿÀdÿËdÿÐdÿÖdÿÛdÿædÿëdÿñdÿödÿdÿdÿdÿdÿdÿ"dÿ'dÿ-dÿ8dÿ=dÿBdÿHdÿSdÿXdÿ^dÿcdÿndÿsdÿydÿ~dÿdÿdÿdÿdÿdÿªdÿ¯dÿ´dÿºdÿÅdÿÊdÿÐdÿÕdÿàdÿådÿëdÿðdÿûdÿdÿdÿdÿdÿdÿ!dÿ'dÿ1dÿ7dÿ<dÿBdÿMdÿRdÿWdÿ]dÿhdÿmdÿsdÿxdÿdÿdÿdÿdÿdÿ£dÿ©dÿ®dÿ¹dÿ¿dÿÄdÿÊdÿÏdÿÚdÿßdÿådÿêdÿõdÿúdÿdÿdÿdÿdÿdÿ dÿ+dÿ1dÿ6dÿ<dÿFdÿLdÿQdÿWdÿbdÿgdÿldÿrdÿdÿdÿdÿdÿdÿdÿ£dÿ¨dÿ³dÿ¹dÿ¾dÿÃdÿÎdÿÔdÿÙdÿßdÿédÿïdÿôdÿúdÿÿdÿdÿdÿdÿdÿ%dÿ+dÿ0dÿ6dÿ@dÿFdÿKdÿQdÿdÿadÿfdÿldÿwdÿ|dÿdÿdÿdÿdÿdÿ¢dÿ­dÿ²dÿ¸dÿ½dÿÈdÿÎdÿÓdÿØdÿãdÿédÿîdÿôdÿÿdÿdÿ	dÿdÿdÿdÿ%dÿ*dÿ/dÿ:dÿ@dÿEdÿKdÿUdÿ[dÿ`dÿfdÿqdÿvdÿdÿdÿdÿdÿdÿdÿ§dÿ¬dÿ²dÿ·dÿÂdÿÈdÿÍdÿÒdÿÝdÿãdÿèdÿîdÿødÿþdÿdÿ	dÿdÿdÿdÿ$dÿ/dÿ4dÿ:dÿ?dÿJdÿOdÿUdÿ%Ãsúýxúýúýú¬ýú·ýúÆýúÖý£úìý©úþ®ú!þ´ú;þ¿úVþÄúpþÉúþÏú¥þÚúºþßúÐþåúàþêúêþõúðþúúðþûõþûÿþûÿûÿûÿ ûÿ+ûÿ1ûÿ6ûÿ<ûÿFûÿLûÿQûÿWûÿþbûÿþgûÿþlûúþrûúþûõþûõþûðþûêþûêþûêþ£ûàþ¨ûàþ®ûÚþ¹ûÚþ¾ûÚþÃûÕþÉûÐþÔûÐþÙûÊþßûÊþäûÊþïûÅþôûÅþúûÅþÿûÀþüºþüºþüµþüµþ%üµþ+üºþ0üµþ5üºþ@üºþFüºþKüÀþQüÀþ[üÅþaüÅþfüÊþlüÐþwüÐþ|üÐþüÐþüÕþüÐþüÐþüÐþ¢üÕþ­üÚþ²üåþ¸üêþ½üõþÈüÿþÎüÿÓüÿØüÿÞüÿéü*ÿîü/ÿôü4ÿùü:ÿý?ÿ	ýDÿýDÿýJÿýJÿ$ýOÿ*ýOÿ/ýOÿ:ýOÿ@ýOÿEýOÿKýOÿUýOÿ[ýOÿ`ýOÿfýOÿqýOÿvýOÿýOÿýOÿýOÿýJÿýJÿýJÿ§ýJÿ¬ýJÿ²ýJÿ·ýJÿÂýJÿÇýJÿÍýDÿÒýJÿÝýJÿãýDÿèýDÿíýDÿøýDÿþýDÿþDÿ	þDÿþDÿþDÿþDÿ$þDÿ)þDÿ4þ?ÿ:þ?ÿ?þDÿDþDÿOþDÿUþ?ÿZþ?ÿ`þ?ÿjþ?ÿpþDÿuþ?ÿþ?ÿþ?ÿþ?ÿþ?ÿþ?ÿ¡þ?ÿ¦þ?ÿ¬þ?ÿ±þ?ÿ¼þ:ÿÁþ:ÿÇþ:ÿÌþ:ÿ×þ:ÿÝþ:ÿâþ:ÿçþ:ÿòþ:ÿøþ:ÿýþ:ÿÿ:ÿÿ4ÿÿ:ÿÿ:ÿÿ:ÿ)ÿ:ÿ.ÿ:ÿ3ÿ:ÿ9ÿ:ÿ>ÿ:ÿIÿ:ÿOÿ:ÿTÿ:ÿYÿ:ÿdÿ:ÿjÿ:ÿoÿ:ÿuÿ:ÿÿ:ÿÿ:ÿÿ:ÿÿ:ÿÿ:ÿ ÿ:ÿ¦ÿ:ÿ«ÿ:ÿ¶ÿ:ÿ»ÿ:ÿÁÿ:ÿÆÿ:ÿÑÿ:ÿÖÿ:ÿÜÿ:ÿáÿ:ÿìÿ:ÿòÿ:ÿ÷ÿ:ÿüÿ:ÿ:ÿ?ÿ?ÿ?ÿ"?ÿ(?ÿ-:ÿ3?ÿ>?ÿC?ÿH?ÿNDÿY?ÿ^DÿdDÿiDÿo?ÿyDÿDÿDÿDÿDÿDÿDÿ¥Dÿ°DÿµDÿ»DÿÀJÿËJÿÐJÿÖJÿÛJÿæJÿëJÿñJÿöJÿJÿJÿJÿJÿJÿ"Oÿ'Oÿ-Jÿ8Oÿ=OÿBOÿHOÿSOÿXOÿ^OÿcOÿnOÿsOÿyOÿ~TÿOÿTÿTÿTÿTÿªTÿ¯Tÿ´TÿºTÿÅTÿÊTÿÐTÿÕTÿàZÿåZÿëZÿðZÿûTÿZÿZÿZÿZÿZÿ!Zÿ'Zÿ1Zÿ7Zÿ<ZÿBZÿM_ÿR_ÿWZÿ]_ÿh_ÿm_ÿs_ÿx_ÿ_ÿ_ÿ_ÿ_ÿ_ÿ£_ÿ©_ÿ®_ÿ¹_ÿ¿_ÿÄ_ÿÊ_ÿÏ_ÿÚ_ÿß_ÿå_ÿê_ÿõ_ÿú_ÿ_ÿ_ÿ_ÿdÿdÿ dÿ+dÿ1_ÿ6dÿ<_ÿFdÿL_ÿQdÿWdÿb_ÿgdÿl_ÿrdÿdÿdÿdÿdÿdÿdÿ£dÿ¨dÿ³dÿ¹dÿ¾dÿÃdÿÎdÿÔdÿÙdÿßdÿédÿïdÿôdÿúdÿÿdÿdÿdÿdÿdÿ%dÿ+dÿ0dÿ6dÿ@dÿFdÿKdÿQdÿdÿadÿfdÿldÿwdÿ|dÿdÿdÿdÿdÿdÿ¢dÿ­dÿ²dÿ¸dÿ½dÿÈdÿÎdÿÓdÿØdÿãdÿédÿîdÿôdÿÿdÿdÿ	dÿdÿdÿdÿ%dÿ*dÿ/dÿ:dÿ@_ÿEdÿK_ÿU_ÿ[_ÿ`dÿfdÿqdÿvdÿdÿdÿdÿdÿ_ÿdÿ§dÿ¬dÿ²dÿ·dÿÂdÿÈdÿÍdÿÒdÿÝdÿãdÿèdÿîdÿødÿþdÿdÿ	dÿdÿdÿdÿ$dÿ/dÿ4dÿ:dÿ?dÿJdÿOdÿUdÿ%Ãsúbýxúgýúrýúýúýúýú±ý£úÆý©úÜý®úûý´úþ¿ú;þÄú[þÉúþÏúþÚúµþßúÊþåúàþêúêþõúðþúúõþûúþûÿþûÿûÿûÿ ûÿ+ûÿ1ûÿ6ûÿ<ûÿFûÿLûÿQûÿWûÿbûÿþgûÿþlûúþrûúþûõþûõþûðþûðþûðþûêþ£ûåþ¨ûåþ®ûàþ¹ûàþ¾ûÚþÃûÚþÉûÕþÔûÕþÙûÕþßûÐþäûÐþïûÐþôûÊþúûÊþÿûÊþüÊþüÊþüÊþüÊþ%üÊþ+üÊþ0üÊþ5üÊþ@üÊþFüÊþKüÐþQüÐþ[üÕþaüÕþfüÚþlüÚþwüàþ|üåþüåþüêþüðþüõþüõþ¢üúþ­üÿþ²üÿ¸üÿ½üÿÈüÿÎüÿÓüÿØü%ÿÞü*ÿéü/ÿîü/ÿôü4ÿùü:ÿý?ÿ	ý?ÿýDÿýDÿýDÿ$ýJÿ*ýJÿ/ýJÿ:ýJÿ@ýJÿEýJÿKýJÿUýJÿ[ýJÿ`ýJÿfýJÿqýJÿvýJÿýJÿýJÿýJÿýJÿýDÿýDÿ§ýDÿ¬ýDÿ²ýDÿ·ýDÿÂýDÿÇýDÿÍý?ÿÒý?ÿÝý?ÿãý?ÿèý?ÿíý?ÿøý?ÿþý?ÿþ?ÿ	þ?ÿþ?ÿþ?ÿþ?ÿ$þ:ÿ)þ:ÿ4þ:ÿ:þ:ÿ?þ:ÿDþ:ÿOþ:ÿUþ:ÿZþ:ÿ`þ:ÿjþ:ÿpþ:ÿuþ:ÿþ4ÿþ4ÿþ4ÿþ4ÿþ4ÿ¡þ4ÿ¦þ4ÿ¬þ4ÿ±þ4ÿ¼þ/ÿÁþ/ÿÇþ/ÿÌþ/ÿ×þ/ÿÝþ/ÿâþ/ÿçþ/ÿòþ/ÿøþ/ÿýþ*ÿÿ/ÿÿ*ÿÿ/ÿÿ*ÿÿ/ÿ)ÿ*ÿ.ÿ*ÿ3ÿ/ÿ9ÿ/ÿ>ÿ/ÿIÿ/ÿOÿ/ÿTÿ/ÿYÿ/ÿdÿ/ÿjÿ/ÿoÿ/ÿuÿ/ÿÿ/ÿÿ/ÿÿ/ÿÿ/ÿÿ/ÿ ÿ/ÿ¦ÿ/ÿ«ÿ/ÿ¶ÿ/ÿ»ÿ/ÿÁÿ/ÿÆÿ/ÿÑÿ/ÿÖÿ/ÿÜÿ/ÿáÿ/ÿìÿ/ÿòÿ/ÿ÷ÿ/ÿüÿ/ÿ/ÿ/ÿ/ÿ4ÿ"4ÿ(4ÿ-4ÿ34ÿ>4ÿC4ÿH4ÿN4ÿY:ÿ^:ÿd:ÿi:ÿo:ÿy:ÿ:ÿ:ÿ:ÿ:ÿ:ÿ?ÿ¥?ÿ°?ÿµ?ÿ»?ÿÀ?ÿË?ÿÐ?ÿÖ?ÿÛ?ÿæ?ÿë?ÿñDÿö?ÿDÿDÿDÿDÿDÿ"Dÿ'Dÿ-Dÿ8Dÿ=DÿBJÿHJÿSJÿXJÿ^JÿcJÿnJÿsJÿyOÿ~OÿOÿOÿOÿOÿOÿªOÿ¯Oÿ´OÿºOÿÅOÿÊTÿÐTÿÕTÿàTÿåTÿëTÿðTÿûTÿTÿTÿTÿTÿTÿ!Zÿ'Zÿ1Zÿ7Zÿ<ZÿBZÿMZÿRZÿWZÿ]ZÿhZÿmZÿsZÿxZÿ_ÿZÿZÿ_ÿ_ÿ£_ÿ©_ÿ®_ÿ¹_ÿ¿_ÿÄ_ÿÊ_ÿÏ_ÿÚ_ÿß_ÿå_ÿê_ÿõ_ÿú_ÿ_ÿ_ÿ_ÿ_ÿdÿ _ÿ+dÿ1_ÿ6_ÿ<_ÿF_ÿL_ÿQdÿW_ÿb_ÿgdÿl_ÿrdÿdÿdÿdÿ_ÿdÿdÿ£dÿ¨dÿ³dÿ¹dÿ¾dÿÃdÿÎdÿÔdÿÙdÿßdÿédÿïdÿôdÿúdÿÿdÿ_ÿdÿdÿdÿ%dÿ+dÿ0dÿ6dÿ@dÿFdÿK_ÿQdÿdÿadÿfdÿldÿwdÿ|dÿdÿdÿdÿdÿdÿ¢dÿ­dÿ²dÿ¸_ÿ½dÿÈ_ÿÎdÿÓdÿØ_ÿãdÿédÿîdÿôdÿÿdÿdÿ	dÿdÿdÿdÿ%_ÿ*dÿ/dÿ:dÿ@dÿE_ÿKdÿUdÿ[dÿ`dÿfdÿqdÿvdÿdÿdÿdÿ_ÿ_ÿ_ÿ§dÿ¬dÿ²dÿ·dÿÂdÿÈdÿÍdÿÒdÿÝdÿã_ÿè_ÿîdÿødÿþdÿdÿ	dÿdÿdÿdÿ$dÿ/dÿ4dÿ:dÿ?dÿJdÿOdÿUdÿ	ÿÿÿûqÿ"Helvetica-Narrow;-	ú"-jÿmúùûmúdÿmúdÿú!0ÿÊùrýmúrýú!2ýÊùjÿmújÿZùûZùûmújÿmú'ÿÿð	&TNPP--'ÿÿ&ÿÿÿÿ&ÿÿÿÿz÷ÀôtÑÿ--ÑÿtÀôz÷&TNPP.	ÿÿÿ--üÿÿÿ-		ú"-%Ãsú3úxú>úúIúúSúú^úúhúúsú£úú©úú®úú´ú£ú¿ú¨úÄú³úÉú³úÏú½úÚúÈúßúÍúåúÒúêúÒúõúÍúúúÈúûÍúûØúûÝúûÝúûâú ûâú+ûèú1ûèú6ûíú<ûíúFûòúLûòúQûøúWûøúbûýúgûýúlûûrûûûûûûûûûûûûûû£ûû¨ûû®ûû¹ûû¾ûûÃûûÉûûÔûûÙûûßûûäûûïûýúôûòúúûíúÿûâúüÝúüâúüâúüèú%üíú+üíú0üòú5üòú@üíúFüíúKüíúQüòú[üøúaüøúfüøúlüòúwüíú|üâúüÝúüØúüÝúüèúüøú¢üû­üû²ü-û¸ü=û½üLûÈüRûÎüÓügûØülûÞüwûéü|ûîüûôüûùüûýû	ýûýûýûýû$ýû*ýû/ý¡û:ý¡û@ý§ûEý§ûKý§ûUý¬û[ý¬û`ý¬ûfý¬ûqý¬ûvý¬ûý±ûý±ûý±ûý±ûý±ûý±û§ý±û¬ý±û²ý·û·ý·ûÂý·ûÇý·ûÍý·ûÒý·ûÝý·ûãý·ûèý·ûíý·ûøý·ûþý·ûþ·û	þ·ûþ·ûþ·ûþ·û$þ·û)þ·û4þ·û:þ·û?þ±ûDþ±ûOþ±ûUþ±ûZþ±û`þ±ûjþ±ûpþ±ûuþ±ûþ±ûþ±ûþ±ûþ±ûþ±û¡þ±û¦þ±û¬þ±û±þ±û¼þ±ûÁþ±ûÇþ±ûÌþ±û×þ±ûÝþ±ûâþ±ûçþ±ûòþ±ûøþ±ûýþ±ûÿ±ûÿ±ûÿ±ûÿ±ûÿ±û)ÿ¬û.ÿ¬û3ÿ¬û9ÿ¬û>ÿ¬ûIÿ¬ûOÿ¬ûTÿ¬ûYÿ¬ûdÿ¬ûjÿ¬ûoÿ¬ûuÿ¬ûÿ¬ûÿ¬ûÿ¬ûÿ¬ûÿ±û ÿ±û¦ÿ±û«ÿ±û¶ÿ±û»ÿ±ûÁÿ±ûÆÿ·ûÑÿ·ûÖÿ·ûÜÿ·ûáÿ·ûìÿ·ûòÿ·û÷ÿ¼ûüÿ¼û¼û¼û¼û¼û"¼û(¼û-¼û3Áû>ÁûCÁûHÁûNÁûYÁû^ÁûdÁûiÁûoÁûyÁûÆûÆûÆûÆûÆûÆû¥Æû°ÆûµÆû»ÆûÀÆûËÆûÐÆûÖÆûÛÌûæÌûëÌûñÌûöÌûÌûÌûÌûÌûÌû"Ìû'Ìû-Ñû8Ñû=ÑûBÑûHÑûSÑûXÑû^ÑûcÑûnÑûsÑûyÑû~ÑûÑûÑûÑûÑûÖûªÖû¯Öû´ÖûºÖûÅÖûÊÖûÐÖûÕÖûàÖûåÜûëÜûðÜûûÜûÜûÜûáûáûáû!áû'áû1áû7áû<áûBæûMæûRæûWæû]æûhæûmæûsæûxæûæûæûæûæûìû£ìû©ìû®ìû¹ìû¿ìûÄìûÊìûÏìûÚìûßìûåìûêìûõìûúìûìûìûìûìûìû ìû+ìû1ìû6ìû<ìûFìûLìûQñûWñûbñûgñûlñûrñûñûñûñûñûñûñû£ñû¨ñû³ñû¹ñû¾ñûÃñûÎñûÔñûÙñûßñûéñûïñûôñûúñûÿñûñûñûñûñû%ñû+ñû0ñû6ñû@ñûFñûKñûQñûñûañûfñûlñûwñû|ñûñûñûñûñûñû¢ñû­ñû²ñû¸ñû½ñûÈñûÎñûÓñûØñûãñûéñûîñûôñûÿöûöû	öûöûöûöû%öû*öû/öû:öû@öûEöûKöûUöû[öû`öûföûqöûvöûöûöûöûöûöûñû§ñû¬ñû²öû·öûÂöûÈöûÍöûÒöûÝöûãöûèöûîöûøöûþöûöû	öûöûöûöû$öû/öû4öû:ñû?ñûJñûOñûUñû%Ãsú)úxú.úú>úúIúúSúúXúú^ú£úhú©úsú®ú~ú´úú¿úúÄúúÉúúÏúúÚú£úßú£úåú¨úêú­úõú¨úúúúûúûúû£úû¨úû¨ú û­ú+û³ú1û³ú6û¸ú<û½úFûÃúLûÃúQûÈúWûÍúbûÍúgûÒúlûÝúrûâúûâúûèúûèúûíúûíúûòú£ûøú¨ûøú®ûøú¹ûýú¾ûýúÃûýúÉûýúÔûýúÙûýúßûûäûýúïûýúôûøúúûòúÿûíúüèúüèúüèúüíú%üíú+üòú0üòú5üòú@üíúFüíúKüòúQüòú[üòúaüøúfüøúlüòúwüíú|üèúüâúüâúüèúüíúüøú¢üû­üû²ü"û¸ü-û½ü7ûÈü=ûÎüGûÓüLûØüWûÞüéügûîügûôürûùüwûý|û	ýûýûýûýû$ýû*ýû/ýû:ýû@ýûEýûKýûUýû[ýû`ý¡ûfý¡ûqý¡ûvý¡ûý¡ûý§ûý§ûý§ûý§ûý§û§ý§û¬ý§û²ý§û·ý§ûÂý§ûÇý§ûÍý§ûÒý§ûÝý§ûãý§ûèý§ûíý§ûøý§ûþý§ûþ§û	þ¡ûþ§ûþ¡ûþ¡û$þ¡û)þ¡û4þ¡û:þ¡û?þûDþûOþûUþûZþû`þûjþûpþûuþûþûþûþûþûþû¡þû¦þû¬þû±þû¼þûÁþûÇþûÌþû×þûÝþûâþûçþûòþûøþûýþûÿûÿûÿûÿûÿû)ÿû.ÿû3ÿû9ÿû>ÿûIÿûOÿûTÿûYÿûdÿûjÿûoÿûuÿûÿûÿûÿûÿûÿû ÿû¦ÿû«ÿû¶ÿû»ÿûÁÿûÆÿûÑÿûÖÿûÜÿûáÿûìÿûòÿû÷ÿûüÿûû¡û¡û¡û"¡û(¡û-¡û3§û>§ûC§ûH§ûN§ûY§û^§ûd§ûi¬ûo¬ûy¬û¬û¬û¬û¬û¬û±û¥±û°±ûµ±û»±ûÀ±ûË±ûÐ±ûÖ±ûÛ·ûæ·ûë·ûñ·ûö·û·û·û·û·û¼û"¼û'¼û-¼û8¼û=¼ûB¼ûH¼ûS¼ûX¼û^¼ûc¼ûn¼ûsÁûyÁû~ÁûÁûÁûÁûÁûÁûªÁû¯Æû´ÆûºÆûÅÆûÊÆûÐÆûÕÌûàÌûåÌûëÌûðÌûûÑûÑûÑûÑûÑûÖû!Öû'Öû1Öû7Öû<ÜûBÜûMÜûRÜûWÜû]ÜûhÜûmÜûsáûxáûáûáûáûáûáû£áû©áû®áû¹æû¿æûÄæûÊæûÏæûÚæûßæûåæûêæûõæûúæûæûæûæûæûæû æû+æû1æû6ìû<ìûFìûLìûQìûWìûbìûgìûlìûrìûìûìûìûìûìûìû£ìû¨ìû³ìû¹ìû¾ìûÃìûÎìûÔìûÙìûßìûéìûïìûôìûúìûÿìûìûìûìûìû%ìû+ìû0ìû6ìû@ìûFìûKìûQìûìûaìûfìûlñûwñû|ñûñûñûñûìûìû¢ñû­ñû²ñû¸ñû½ñûÈñûÎñûÓñûØñûãñûéñûîñûôñûÿñûñû	ñûñûñûñû%ñû*ñû/ñû:ñû@ñûEñûKñûUñû[ñû`ñûfñûqñûvñûñûñûñûñûñûñû§ñû¬ñû²ñû·ñûÂñûÈñûÍñûÒñûÝñûãñûèñûîñûøñûþñûñû	ñûñûñûñû$ñû/ñû4ñû:ñû?ñûJñûOñûUñû%Ãsú#úxú.úú3úú>úúIúúSúú^ú£úcú©únú®úxú´ú~ú¿úúÄúúÉúúÏúúÚúúßú£úåú£úêú¨úõúúúúúûúûúûúûúû£ú û£ú+û¨ú1û­ú6û³ú<û³úFû¸úLû¸úQû½úWû½úbûÈúgûÍúlûÒúrûØúûÝúûâúûâúûâúûèúûèú£ûíú¨ûòú®ûøú¹ûøú¾ûøúÃûøúÉûýúÔûýúÙûýúßûûäûýúïûýúôûøúúûòúÿûíúüíúüèúüèúüíú%üíú+üòú0üíú5üíú@üòúFüòúKüòúQüøú[üøúaüøúfüøúlüøúwüòú|üíúüíúüíúüíúüòúüýú¢üû­üû²üû¸ü"û½ü-ûÈü7ûÎü=ûÓüGûØüLûÞüWûéüîübûôügûùülûýwû	ý|ûý|ûýûýû$ýû*ýû/ýû:ýû@ýûEýûKýûUýû[ýû`ýûfýûqý¡ûvý¡ûý¡ûý¡ûý¡ûý¡ûý¡ûý¡û§ý¡û¬ý¡û²ý¡û·ý¡ûÂý¡ûÇý¡ûÍý¡ûÒý¡ûÝý¡ûãý¡ûèý¡ûíý¡ûøýûþý¡ûþ¡û	þûþûþûþû$þû)þû4þû:þû?þûDþûOþûUþûZþû`þûjþûpþûuþûþûþûþûþûþû¡þû¦þû¬þû±þû¼þûÁþûÇþûÌþû×þûÝþûâþûçþûòþûøþûýþûÿûÿûÿûÿûÿû)ÿû.ÿû3ÿû9ÿ|û>ÿ|ûIÿ|ûOÿ|ûTÿ|ûYÿ|ûdÿ|ûjÿ|ûoÿ|ûuÿ|ûÿ|ûÿ|ûÿ|ûÿûÿû ÿû¦ÿû«ÿû¶ÿû»ÿûÁÿûÆÿûÑÿûÖÿûÜÿûáÿûìÿûòÿû÷ÿûüÿûûûûû"û(û-û3û>ûCûHûNûYû^ûd¡ûi¡ûo¡ûy¡û¡û¡û¡û§û§û§û¥§û°§ûµ§û»§ûÀ§ûË¬ûÐ¬ûÖ¬ûÛ¬ûæ¬ûë¬ûñ¬ûö±û±û±û±û±û±û"±û'±û-±û8±û=·ûB·ûH·ûS·ûX·û^·ûc·ûn·ûs·ûy·û~·û¼û¼û¼û¼û¼ûª¼û¯¼û´¼ûºÁûÅÁûÊÁûÐÁûÕÁûàÆûåÆûëÆûðÆûûÌûÌûÌûÌûÑûÑû!Ñû'Ñû1Ñû7Öû<ÖûBÖûMÖûRÖûWÜû]ÜûhÜûmÜûsÜûxÜûáûáûáûáûáû£áû©áû®áû¹áû¿áûÄáûÊáûÏáûÚæûßæûåæûêæûõæûúæûæûæûæûæûæû æû+æû1æû6æû<æûFæûLæûQæûWæûbìûgìûlìûrìûìûìûìûìûìûìû£ìû¨ìû³ìû¹ìû¾ìûÃìûÎìûÔìûÙìûßìûéìûïìûôìûúìûÿìûìûìûìûìû%ìû+ìû0ìû6ìû@ìûFìûKìûQìûìûaìûfìûlìûwñû|ìûìûìûìûñûñû¢ñû­ñû²ñû¸ñû½ñûÈñûÎñûÓñûØñûãñûéñûîñûôñûÿñûñû	ñûñûñûñû%ñû*ñû/ñû:ñû@ñûEñûKñûUñû[ñû`ñûfñûqñûvñûñûñûñûñûñûñû§ñû¬ñû²ñû·ñûÂñûÈñûÍñûÒñûÝñûãñûèñûîñûøñûþñûñû	ñûñûñûñû$ñû/ñû4ñû:ñû?ñûJñûOñûUñû%Ãsú9úxúCúúSúú^úúnúúxúúú£úú©ú¨ú®ú¸ú´úÃú¿úÍúÄúÒúÉúâúÏúíúÚúòúßúýúåúûêúûõúûúúûûûûûûûûûûû ûû+û"û1û"û6û"û<û"ûFû"ûLû"ûQû"ûWû'ûbû"ûgû'ûlû'ûrû'ûû"ûû"ûûûûûûûûû£ûû¨ûû®ûû¹ûû¾ûûÃûýúÉûøúÔûøúÙûøúßûøúäûòúïûíúôûÝúúûÒúÿûÈúüÃúüÃúüÈúüÒú%üØú+üÝú0üâú5üÝú@üÝúFüâúKüâúQüèú[üíúaüòúfüòúlüèúwüØú|üÈúü¸úü³úü¸úüÈúüâú¢üýú­üû²ü2û¸üLû½üÈülûÎüwûÓüûØüûÞüûéüûîüûôü¡ûùü¡ûý§û	ý¬ûý¬ûý±ûý±û$ý±û*ý±û/ý·û:ý·û@ý·ûEý·ûKý·ûUý·û[ý·û`ý¼ûfý¼ûqý¼ûvý¼ûýÁûýÁûýÁûýÁûýÁûýÁû§ýÁû¬ýÁû²ýÁû·ýÆûÂýÆûÇýÆûÍýÆûÒýÆûÝýÆûãýÆûèýÆûíýÆûøýÌûþýÌûþÌû	þÌûþÌûþÌûþÌû$þÌû)þÌû4þÑû:þÌû?þÌûDþÌûOþÌûUþÑûZþÑû`þÑûjþÑûpþÑûuþÑûþÑûþÑûþÑûþÑûþÑû¡þÑû¦þÑû¬þÖû±þÖû¼þÖûÁþÖûÇþÖûÌþÖû×þÖûÝþÖûâþÖûçþÖûòþÖûøþÜûýþÜûÿÜûÿÜûÿÜûÿÜûÿÜû)ÿÜû.ÿÜû3ÿÜû9ÿÜû>ÿÜûIÿÜûOÿÜûTÿÜûYÿÖûdÿÜûjÿÜûoÿÖûuÿÜûÿÜûÿÜûÿÜûÿÜûÿÜû ÿÜû¦ÿÜû«ÿÜû¶ÿÜû»ÿÜûÁÿÜûÆÿáûÑÿáûÖÿáûÜÿáûáÿáûìÿáûòÿáû÷ÿáûüÿáûáûáûáûáû"áû(áû-áû3æû>æûCæûHæûNæûYæû^æûdæûiæûoæûyæûæûæûæûæûæûæû¥æû°æûµæû»æûÀæûËæûÐæûÖæûÛæûææûëìûñìûöìûìûìûìûìûìû"ìû'ìû-ìû8ìû=ìûBìûHìûSìûXìû^ìûcìûnìûsìûyìû~ìûìûìûìûìûìûªìû¯ìû´ìûºìûÅìûÊìûÐìûÕìûàìûåìûëìûðìûûìûìûìûìûìûìû!ìû'ìû1ñû7ñû<ìûBìûMñûRñûWñû]ñûhñûmñûsñûxñûñûñûñûñûñû£ñû©ñû®ñû¹ñû¿ñûÄñûÊñûÏñûÚñûßñûåñûêñûõñûúñûñûñûñûñûñû ñû+ñû1ñû6ñû<ñûFñûLñûQñûWñûbñûgñûlñûrñûñûñûñûñûñûñû£ñû¨ñû³ñû¹ñû¾ñûÃñûÎñûÔñûÙñûßñûéñûïñûôñûúñûÿñûñûñûñûñû%ñû+ñû0ñû6ñû@ñûFñûKñûQñûñûañûfñûlñûwñû|ñûñûñûñûñûñû¢ñû­ñû²ñû¸ñû½ñûÈñûÎñûÓñûØñûãñûéñûîñûôñûÿñûñû	ñûñûñûñû%ñû*ñû/ñû:ñû@ñûEñûKñûUñû[ñû`ñûföûqöûvñûñûñûñûñûñûñû§ñû¬ñû²ñû·ñûÂñûÈñûÍñûÒñûÝñûãñûèñûîñûøñûþñûñû	ñûñûñûñû$ñû/ñû4ñû:ñû?ñûJñûOñûUñû	ÿÿÿûqÿ"Helvetica-Narrow;-	ú"-üûmúømúöûmúöûú!0¡ûÊùúmúúú!2¯ùÊùüûmúüûZøZømúüûmú'ÿÿð&TNPP--'ÿÿ&ÿÿÿÿ&ÿÿÿÿz÷ÿt -- tÿz÷&TNPP	.	ÿÿÿ--üÿÿÿ-	ú"-%Ãsúxúú8úHúXúbúm£ú©ú¢®úÇ´úò¿úÄúAÉúaÏú|Úúßú¦åú±êúÁõú«úúûû¡û¦û¦û« û«+û¦1û¦6û¦<û¦Fû¦LûQûWûbûgûlûrûûûûûû|û|£û|¨ûv®ûq¹ûf¾ûVÃûGÉû<Ôû1Ùû1ßû,äû1ïû1ôû'úû!ÿûüüüü%ü+üò0ü×5ü²@üFüXKü8Qü-[ü=aüSfürlüwü|ü¢ü¢üü¢ü­ü½¢üÇ­üÇ²ü·¸ü½üMÈüÎü¹ÓüyØü^Þünéü©îüøôüXùü½ý	ýVýýÁýà$ýû*ý/ý :ý+@ý5Eý;Ký;Uý@[ýE`ýEfýEqýEvýEýEýEýEýEýEýE§ýE¬ýE²ýE·ýEÂýEÇýEÍýEÒýEÝýEãýEèýEíýEøýEþýEþE	þEþEþEþE$þE)þE4þE:þE?þEDþEOþEUþEZþE`þEjþEpþEuþ@þ@þEþEþEþE¡þE¦þE¬þE±þE¼þEÁþEÇþEÌþE×þEÝþEâþEçþEòþEøþEýþEÿEÿEÿEÿEÿE)ÿE.ÿE3ÿE9ÿE>ÿEIÿEOÿETÿEYÿEdÿEjÿEoÿEuÿEÿEÿEÿEÿEÿE ÿE¦ÿE«ÿE¶ÿE»ÿEÁÿEÆÿEÑÿEÖÿEÜÿEáÿEìÿEòÿE÷ÿEüÿEEEEE"E(E-E3E>ECEHENEYE^EdEiEoEyEEEEEEE¥E°EµE»EÀEËEÐEÖEÛEæEëEñEöEEEEEE"E'E-E8E=EBEHESEXE^EcEnEsEyE~EEEEEEªE¯E´EºEÅEÊEÐEÕEàEåEëEðEûEEEEEE!E'E1E7E<EBEMEREWE]EhEmEsExEEEEEE£E©E®E¹E¿EÄEÊEÏEÚEßEåEêEõEúEEEEEE E+E1E6E<EFELEQEWEbEgElErEEEEEEE£E¨E³E¹E¾EÃEÎEÔEÙEßEéEïEôEúEÿEEEEE%E+E0E6E@EFEKEQEEaEfElEwE|EEEEEE¢E­E²E¸E½EÈEÎEÓEØEãEéEîEôEÿEE	EEEE%E*E/E:E@EEEKEUE[E`EfEqEvEEEEEEE§E¬E²E·EÂEÈEÍEÒEÝEãEèEîEøEþEE	EEEE$E/E4E:E?EJEOEUE%Ãsúóxúú-úHú]úmú£ú§©úÍ®ú÷´ú!¿úQÄúvÉúÏú¶ÚúËßúàåúðêúõúðúúÛûæûëûðûöûö ûû+ûû1ûö6ûö<ûöFûöLûðQûëWûæbûægûÛlûÛrûÛûÖûÑûÑûËûÆûÁ£ûÁ¨û»®û¶¹û±¾û¡ÃûÉûÔû|Ùû|ßûväû|ïûvôûqúûfÿûaüVüLüLüL%üL+üA0ü,5ü@üìFüÍKü²Qü­[ü²aüÂfüÜlüìwü÷|üüü÷ü÷ü÷üüü¢ü­ü²ü¸üò½üÇÈüÎüXÓü(ØüÞüéüCîüôüÂùüýG	ý|ý¦ýÆýÛ$ýð*ýû/ý:ý@ýEý Ký%Uý%[ý+`ý+fý+qý0vý0ý0ý0ý0ý0ý0ý0§ý5¬ý5²ý0·ý5Âý5Çý5Íý5Òý5Ýý5ãý5èý5íý5øý5þý5þ5	þ5þ5þ5þ5$þ5)þ54þ5:þ5?þ5Dþ5Oþ5Uþ5Zþ5`þ5jþ5pþ0uþ0þ5þ0þ0þ5þ5¡þ5¦þ5¬þ5±þ5¼þ5Áþ5Çþ5Ìþ5×þ5Ýþ5âþ5çþ5òþ5øþ5ýþ5ÿ5ÿ5ÿ5ÿ5ÿ5)ÿ5.ÿ53ÿ59ÿ5>ÿ5Iÿ5Oÿ5Tÿ5Yÿ5dÿ5jÿ5oÿ5uÿ5ÿ5ÿ5ÿ5ÿ5ÿ5 ÿ;¦ÿ5«ÿ;¶ÿ;»ÿ;Áÿ;Æÿ;Ñÿ;Öÿ;Üÿ;áÿ;ìÿ;òÿ;÷ÿ;üÿ;;;;;";(;-;3;>;C;H;N;Y@^;d@i@o@y@@@@@@@¥@°@µ@»@À@Ë@Ð@Ö@Û@æ@ë@ñ@ö@E@EEE"E'E-E8E=EBEHESEXE^EcEnEsEyE~EEEEEEªE¯E´EºEÅEÊEÐEÕEàEåEëEðEûEEEEEE!E'E1E7E<EBEMEREWE]EhEmEsExEEEEEE£E©E®E¹E¿EÄEÊEÏEÚEßEåEêEõEúEEEEEE E+E1E6E<EFELEQEWEbEgElErEEEEEEE£E¨E³E¹E¾EÃEÎEÔEÙEßEéEïEôEúEÿEEEEE%E+E0E6E@EFEKEQEEaEfElEwE|EEEEEE¢E­E²E¸E½EÈEÎEÓEØEãEéEîEôEÿEE	EEEE%E*E/E:E@EEEKEUE[E`EfEqEvEEEEEEE§E¬E²E·EÂEÈEÍEÒEÝEãEèEîEøEþEE	EEEE$E/E4E:E?EJEOEUE%Ãsúþxúú8úSúrúú§£úÇ©úç®ú´ú'¿úGÄúaÉú|ÏúÚúßú«åú±êúÁõú«úúûû¡û¦û«û« û«+û«1û«6û¦<û¦Fû«Lû¦Qû¦Wû¦bû¦gû¡lû¡rû¦û¦û¦û¦û¦û¦û¦£û¦¨û¦®û¦¹û¡¾ûÃûÉûÔûÙûßûäûïûôûúûÿûüü|ü|üv%üv+üq0üf5üV@üGFü<Kü1Qü,[ü,aü1fü<lüAwüG|üGüGüGüLüGüQ¢üQ­üQ²üL¸üA½ü1ÈüÎüÓüòØüìÞüòéüîüôü<ùüVýq	ýý¡ý±ý»$ýÆ*ýÑ/ýÖ:ýà@ýæEýëKýëUýð[ýö`ýöfýûqýûvýûýýýýýý§ý¬ý²ý·ýÂýÇýÍýÒýÝýãýèýíýøýþýþ	þþþþ$þ)þ4þ:þ?þDþOþUþZþ`þjþpþuþþþþþþ¡þ¦þ¬þ±þ¼þÁþÇþÌþ×þÝþâþçþòþøþýþÿÿÿÿÿ)ÿ.ÿ3ÿ9ÿ>ÿIÿOÿTÿYÿdÿjÿoÿuÿÿÿÿÿÿ ÿ¦ÿ«ÿ¶ÿ»ÿÁÿÆÿÑÿ ÖÿÜÿ áÿ ìÿ òÿ ÷ÿ üÿ     " ( -%3%>%C%H%N%Y%^%d%i%o%y+%+++++¥+°+µ+»+À+Ë+Ð+Ö0Û+æ0ë0ñ0ö000000"0'0-080=0B0H0S5X0^0c5n0s5y5~555555ª5¯5´5º5Å5Ê5Ð5Õ5à5å;ë5ð5û;;;;;;!;';1;7;<;B;M;R;W;];h;m;s;x;;@@@@£@©@®@¹@¿@Ä@Ê@Ï@Ú@ß@å@ê@õ@úEEEEEE E+E1E6E<EFELEQEWEbEgElErEEEEEEE£E¨E³E¹E¾EÃEÎEÔEÙEßEéEïEôEúEÿEEEEE%E+E0E6E@EFEKEQEEaEfElEwE|EEEEEE¢E­E²E¸E½EÈEÎEÓEØEãEéEîEôEÿEE	EEEE%E*E/E:E@EEEKEUE[E`EfEqEvEEEEEEE§E¬E²E·EÂEÈEÍEÒEÝEãEèEîEøEþEE	EEEE$E/E4E:E?EJEOEUE%Ãsúxúú§ú½ú×úìú£ú©ú1®úL´ú¿úqÄúÉúÏúÚú«ßú¶åúÁêúËõú±úúûû¡û¡û¦û¦ û¦+û¦1û¦6û¡<û¡Fû¡Lû¡Qû¡Wû¡bûgûlûrûûûûûûû£û¨û®û¹û¾ûÃûÉûÔûÙûßûäûïûôûúûÿûüü|ü|üv%üv+üq0üq5ül@ülFüfKüfQüf[üfaüffüllüfwüf|ülülülüqüvüv¢üv­üv²ü|¸üv½üvÈüvÎü|Óü|ØüÞüéüîüôüùüý¡	ý¦ý«ý±ý¶$ý»*ýÁ/ýÁ:ýÆ@ýËEýËKýÑUýÖ[ýÖ`ýÛfýÛqýàvýàýàýæýæýæýæýë§ýë¬ýë²ýð·ýðÂýðÇýðÍýðÒýöÝýöãýöèýöíýöøýöþýöþû	þûþûþöþö$þû)þö4þö:þû?þöDþöOþöUþöZþö`þöjþöpþöuþöþðþðþðþðþð¡þð¦þð¬þð±þð¼þðÁþðÇþðÌþð×þðÝþðâþðçþðòþëøþëýþðÿëÿëÿëÿëÿë)ÿë.ÿë3ÿë9ÿë>ÿëIÿëOÿëTÿðYÿëdÿðjÿðoÿðuÿðÿðÿðÿðÿöÿö ÿö¦ÿö«ÿö¶ÿö»ÿöÁÿûÆÿûÑÿûÖÿûÜÿûáÿìÿòÿ÷ÿüÿ"(-3>CHNY^dioy¥°µ»À Ë Ð Ö Û æ ë ñ ö %%%%%"%'%-%8%=+B+H+S+X+^+c+n+s+y+~+0+000ª0¯0´0º0Å0Ê0Ð0Õ0à0å0ë0ð0û555555!5'51575<5B5M5R5W5]5h5m5s;x;5;;;;£;©;®;¹;¿;Ä;Ê;Ï;Ú;ß;å;ê;õ;ú@;@@@@ @+@1@6@<@F@L@Q@W@b@g@l@r@@@@@@@£E¨@³E¹@¾@Ã@Î@Ô@ÙEß@é@ï@ôEúEÿE@EEE%E+@0E6E@EFEKEQEEaEfElEwE|EEEEEE¢E­E²E¸E½EÈEÎEÓEØEãEéEîEôEÿEE	EEEE%E*E/E:E@EEEKEUE[E`EfEqEvEEEEEEE§E¬E²E·EÂEÈEÍEÒEÝEãEèEîEøEþEE	EEEE$E/E4E:E?EJEOEUE	ÿÿÿûqÿ"Helvetica-Narrow;-	ú"-KmúÚmúEmúEú!0ðÊùçmúçú!1Êùmúú!29ÊùKmúKZKýý	! 400 qüK]]	! 600 ºKZÚZÚhú'ÿÿð&TNPP--'ÿÿ&ÿÿÿÿ&ÿÿÿÿÁýî¡û`ÿ"Arialic-.	2LûýWavelength / nmYPY$YYX-Y,-,Y&ÿÿÿÿ&ÿÿÿÿWøý¦ùû ÿSymbolK-ð.	2À>ùe b8û`ÿ"Arialª-ð	2&>ùx 10P,YYûÿ"ArialK-ð	2øù-4#9û`ÿ"Arialª-ð	2>ù / M,-,ûÿ"ArialK-ð	2ÿù-1#9û`ÿ"Arialª-ð	25ÿ>ù cm,Pûÿ"ArialK-ð	23þù-1#9&ÿÿÿÿ&ÿÿÿÿ¸ÿ þÀÿôþ--û¼"Systemn-ðôþ`ÿ	ú"-¸ÿ¸ÿTý¸ÿ--ð'ÿÿü-$¸ÿþÿþÛÿþ&ÿÿÿÿ&ÿÿÿÿ4ÿð<ÿÄ--ðÄÜÿ,þ	ú"-4ÿ$4ÿ--ð'ÿÿü-$4ÿïÿfWÿf&ÿÿÿÿ&ÿÿÿÿ¶b¾6--ð6^	ú"-ú¶¶--ð'ÿÿü-$¶aØÙØ&ÿÿÿÿ&ÿÿÿÿÿNúÿ"û--ð"û6úîþ	ú"-æûÿùÿ--ð'ÿÿü-$ÿMúkÿÄú±ÿÄú&ÿÿÿÿ&ÿÿÿÿ,û ù4ûtú--ðtúÔûÜùú	ú"-8û,ûÔø,û--ð'ÿÿü-$,ûù	ûúOûú&ÿÿÿÿ&ÿÿÿÿLüTýTü(þ--ðäýôüTý¬û	ú"-üLüìþLü--ð'ÿÿü-$Lü!þoüªý)üªý&ÿÿÿÿ&ÿÿÿÿüZü.--ðê*ýZâû	ú"-ÿüòü--ð'ÿÿü-$ü'¥ü°_ü°&ÿÿÿÿ&ÿÿÿÿü6ü--ðÆ*ý6âû	ú"-jüÎü--ð'ÿÿü-$ü¥ü_ü&ÿÿÿÿ&ÿÿÿÿpÿ¶xÿ--ðòÐþ	ú"-Npÿêpÿ--ð'ÿÿü-$pÿµMÿ,ÿ,&ÿÿÿÿ&ÿÿÿÿ&ÿÿÿÿ*øV~ùûpÿ"Arialª-.	2.ùd(a)0P0&ÿÿÿÿ&ÿÿÿÿ0ûûêüûpÿ"ArialK-ð.	2üj(b)0P0&ÿÿÿÿ&ÿÿÿÿ*sÿNbûpÿ"Arialª-ð.	2d(c)0H0&ÿÿÿÿ&ÿÿÿÿ0ÙÈûpÿ"ArialK-ð.	2xj(d)0P0&ÿÿÿÿ&TNPP&ÿÿÿÿ--ð-ðÿÿ
Figure S1. Changes in the electronic absorption spectra of:  (a) 1;  (b) 2;  (c) 3; (d) 4;  in CH2Cl2 solution upon electrochemical reduction.  Arrows indicate spectral changes on stepping through  0.0V to - 1.2 V applied potentials versus SCE. 


Figure S2. Changes in the electronic absorption spectra of:  (a) 5;  (b) 6;  (c) 7; (d) 8;  in CH2Cl2 solution upon electrochemical reduction.  Arrows indicate spectral changes on stepping through  0.0V to - 0.8 V; applied potentials versus SCE. 


úú®ú¹úÓúî©úù´ú¹ú(Äú8ÉúMÔúhßúxäúïúôú­ÿú²û²û½ûÂ ûÂ+ûÂ5ûÂ;ûÇFûÇKûÍVû×aû×fûâqûçvûíû÷û÷ûòûò¢û÷¬û÷·ûü½û÷ÇûòÍûòØû÷âûòèûòóûíøûíüíüçüçüç#üâ.üâ9üâ>üÝIüÝOüÝYüÝdüÝjü×uüÝzü×üÝüÝü× ü×¥üÝ°ü×»üÒÀüÒËüÇÑüÇÛüÂæü½ìü¸öü½üü½ýÂýÂýÍ"ýÍ'ýÒ2ý×=ý×BýÝMýâRýç]ýçhýçmýçxýç~ýâýâýâýç£ýò©ýü´ý¿ýÄý"Ïý,Ôý7ßýAêýLïýWúýÿýgþqþvþ|%þ+þ6þ@þFþQþ¡Vþ¦aþ¬lþ±qþ¶|þ»þ»þÁþÆþÆ§þË­þÑ·þÖÂþÖÈþÛÒþÛØþáãþáîþæóþëþþëÿëÿñÿñÿö)ÿû.ÿû9ÿûDÿûIÿTÿZÿeÿoÿuÿÿÿÿÿ ÿ«ÿ°ÿ»ÿÆÿËÿÖÿÜÿæÿñÿ÷ÿ   "&-&2&=&H&M+X+]+h+s+x00+00¤0¯0´0¿0Ê0Ï0Ú0ß0ê0õ0ú0005 5&50565A5K5Q5;a;l;w;|;;;;¢@§;²@¸;Â;Í@Ó@Ý@ã@î@ù@þ@	@@@$@)@4@9@D@O@U@_@e@p@z@@@@@¦@«@¶@»;Æ;Ñ;Ö;á;ç;ñ;ü;;;;;(;-;8;=;H;S5X5c5h5s5~55555©5¯5º5¿5Ê5Õ5Ú5å5ê5õ55505 0+010;0A0L0V00g0l0w000++¢+­+²+½+Ã+Í+Ø+Þ+é+î+ù++	000$0/545?5E5O;Z;`;j@p@@EEEK¦K±K¶KÁKÆKÑPÜPáPìPòPüPUUUU(U3U8UCUHUSUÂ%_ú¾úÃúÓúÞúé©úþ´ú¹úÄú(Éú8ÔúMßúSäúSïúcôúmÿúhûmûsûm ûm+ûs5ûm;ûcFûcKû]VûSaûMfûHqûCvû8û8û.û#û¢û¬û·û½ûÇûÍûØûâûþèûóûøûþüüüü#ü.ü9ü#>ü(Iü3OüCYüHdüXjücuüszüüüü¨ ü¸¥ü½°üÇ»üÇÀüÍËüÍÑüÍÛüÒæüÒìüÒöüÒüüÝýâýÝýç"ýí'ýò2ýò=ýòBý÷MýüRý]ýhýmýüxý÷~ý÷ýòý÷ýò£ý÷©ýü´ý¿ýÄýÏýÔý"ßý,êý7ïý<úýGÿýLþQþþg%þl+þq6þ|@þFþQþVþaþlþ¦qþ¦|þ¬þ±þ±þ¶þ»§þÁ­þÁ·þÆÂþÆÈþÆÒþËØþÑãþÑîþÑóþÖþþÛÿÛÿÛÿáÿá)ÿæ.ÿæ9ÿæDÿëIÿëTÿëZÿëeÿñoÿñuÿñÿñÿñÿñÿñ ÿë«ÿë°ÿë»ÿëÆÿëËÿëÖÿëÜÿëæÿëñÿë÷ÿëññöö"û-û2=HMX]hsx¤¯´¿ÊÏÚßêõú &06AKQalw|¢§²¸ÂÍÓÝãîùþ	$)49DOU_epz¦«¶»ÆÑûÖûáûçöñöüöñññë(ë-ë8æ=æHáSáXácÛhÛsÛ~ÖÖÖÖÖ©Ñ¯ÑºÑ¿ÑÊÑÕËÚËåËêËõÆÆÁÁÁ »+»1»;¶A¶L¶V±±g¬l¬w¬¬¦¦¦¢¡­¡²¡½ÃÍØÞ¡é¡î¡ù¡¦	¬¬±$¶/»4Á?ÆEÑOÖZÛ`æjëpñû¦± ¶&Á+Æ+Ñ0Ü5á;ì;ò@üEEEKK(K3P8PCPHPSPÂ%_ú¾úÃúÉúÙúã©úé´úù¹úþÄúÉúÔúßú(äú.ïú3ôú3ÿú3û.û.û( û(+û#5û;ûFûKûþVûóaûéfûÓqûÎvû¾û´û¤ûû¢û¬û·ûy½ûiÇûoÍûoØûyâûtèûtóûyøûyü~üüü#ü¤.ü®9üÃ>üÞIüÞOüóYüdüjü3uüCzüXüsüü ü¨¥ü²°ü½»üÇÀüÒËü×ÑüÝÛüâæüçìüçöüçüüâýçýíýí"ýò'ýü2ý=ýBýMýRý]ýhýmýxý~ýýýý£ýü©ý´ý¿ýÄýÏýÔýßýêýïý'úý,ÿý2þ<þGþL%þW+þ6þg@þlFþvQþ|Vþaþlþqþ|þþ¡þ¡þ¦þ¬§þ±­þ±·þ¶Âþ¶Èþ»Òþ»Øþ»ãþÁîþÁóþÆþþÆÿÆÿËÿËÿË)ÿÑ.ÿÑ9ÿÖDÿÖIÿÖTÿÛZÿÛeÿÖoÿÛuÿÛÿÛÿÖÿÖÿÖ ÿÖ«ÿÑ°ÿÑ»ÿËÆÿËËÿËÖÿËÜÿËæÿËñÿË÷ÿÑÑÑÖÛ"Û-á2á=æHæMëXë]ëhësñxñññññ¤ñ¯ñ´ñ¿ñÊñÏñÚñßñêñõëúëëëë ë&ë0ë6ëAëKñQññañlñwñ|öööö¢ö§ö²ö¸öÂûÍöÓöÝöãöîöùöþö	öññ$ñ)ñ4ñ9ñDëOëUë_ëeëpëzææááá¦á«Û¶Û»ÛÆÖÑÖÖÑáÑçÑñËüÆÆÆÁ»(»-¶8¶=±H¬S¬X¦c¦h¡s¡~©¯º¿ÊÕÚåêõ|| v+v1q;qAlLlVgggalwWWQ¢Q­L²L½LÃLÍLØLÞLéLîLùQW	g$l/v4|?EOZ¦`¬j¶pÁËÖáæñ¦û±¶ÁÆÑ Ü á&ì+ò0ü5;;@@(E3E8KCKHKSKÂ%_úúúÃúÙúî©ú´ú¹ú3ÄúMÉúhÔúßúäú¨ïú¸ôúÂÿúÒûÝûâûç ûí+ûò5ûò;ûòFû÷KûVûaûfûqû'vû2û<ûAûGûL¢ûL¬ûL·ûQ½ûQÇûQÍûQØûLâûLèûLóûGøûGüGüAü7ü2#ü2.ü,9ü'>ü"IüOüYüdüjüuüzüüüü÷ü÷ üí¥üí°üâ»üÝÀü×ËüÍÑüÍÛüÂæüÂìüÂöüÂüü½ý½ýÂýÇ"ýÍ'ýÍ2ýÇ=ýÍBýÒMýÒRý×]ýÝhýÝmýâxýÝ~ýÝýÝýâýç£ýí©ýü´ý¿ýÄý"Ïý2Ôý<ßýGêýQïýúýgÿýqþvþþ%þ+þ6þ@þ¡Fþ¦Qþ¬Vþ¬aþ¶lþ¶qþ»|þÁþÆþËþËþÑ§þÖ­þÖ·þÛÂþáÈþáÒþæØþëãþëîþñóþñþþöÿûÿûÿûÿ)ÿ.ÿ9ÿDÿIÿTÿZÿeÿoÿuÿÿÿÿÿ ÿ «ÿ °ÿ&»ÿ&Æÿ&Ëÿ+Öÿ+Üÿ+æÿ+ñÿ0÷ÿ00555"5-52;=;H;M;X;]@h@s@x@@EEE¤E¯E´E¿EÊEÏEÚEßEêEõKúKKKK K&K0K6PAPKPQPPaPlUwU|UUUU¢U§U²U¸UÂUÍUÓUÝ[ãUîUù[þU	[[[$[)[4[9[D[O[U[_[e[p[z[[[[[¦[«[¶[»[Æ[Ñ[Ö[á[ç[ñ[ü[[[[[([-[8[=[H[S[X[c[h`s[~[[```©[¯`º[¿`Ê`Õ`Ú`å`ê`õ````` `+`1`;`A`L`V``g`l`w`````¢`­`²`½`Ã`Í`Ø`Þ`é`î`ù``	```$`/`4`?`E`O`Z```j`p``````¦`±`¶`Á`Æ`Ñ`Ü`á`ì[ò`ü`````(`3`8`C`H`S`	ÿÿÿûqÿ"Helvetica-Narrow;-	ú"-kxúúxúexúe'ú!0Öùòxúò'ú!2Öù~xú~'ú!4*ÖùkxúkXkúºú	! 300 ºÛùkßýºßý	! 400 º=ýkAºA	! 500 ºk¢º¢	! 600 ºkXúXúsú'ÿÿð&TNPP--'ÿÿ&ÿÿÿÿ&ÿÿÿÿ÷ÄüpÕ--ÕpÄü÷&TNPP.	ÿÿÿ--üÿÿÿ-	ú"-	Â%_úÔúéúôú	ú©ú9´úI¹ú^ÄúsÉúÔúßú¨äú³ïú½ôúÈÿúÍûÒûØûÝ ûØ+ûÝ5ûÝ;ûâFûíKûíVûøaûfûqûvûûûûû¢û¬û·ûý½ûøÇûøÍûòØûíâûèèûÝóûÝøûØüÒüÍüÈüÈ#ü¸.ü¸9ü¸>ü­Iü¨Oü¨Yü£düjüuü£züü¨ü¨ü¸ ü¸¥ü½°üÍ»üÝÀüèËüíÑüøÛüæüìüöüüü"ý'ý7ý="ýG'ýW2ýb=ýrBýMýRý]ýhý¡mý¬xý±~ý¼ý¼ýÁýÇ£ýÌ©ýÑ´ýÑ¿ýÑÄýÑÏýÖÔýÖßýÖêýÑïýÑúýÑÿýÑþÑþÑþÖ%þÖ+þÜ6þÜ@þÜFþáQþæVþìaþñlþöqþü|þüþþþþ§þ­þ·þÂþ!Èþ!Òþ&Øþ+ãþ1îþ1óþ1þþ1ÿ6ÿ6ÿ;ÿ;)ÿA.ÿA9ÿADÿFIÿFTÿFZÿFeÿKoÿKuÿKÿKÿKÿKÿP ÿP«ÿK°ÿK»ÿKÆÿKËÿKÖÿPÜÿKæÿPñÿK÷ÿPPPPP"P-P2P=PHPMPXP]PhKsKxKKFFA¤A¯;´;¿;Ê;Ï6Ú6ß6ê6õ6ú666; ;&A0A6FAFKKQKKaKlPwP|PPPK¢K§K²F¸FÂFÍAÓAÝ;ã;î;ù;þ6	666$;);4A9ADFOKUP_Ve[p`zkkv¦«¶»ÆÑÖ á ç¥ñ¥ü«««°°(°-µ8µ=»H»S»X»c»h»sÀ~ÀÀÀÀÀ©Å¯ÅºÀ¿ÅÊÅÕÅÚÅåÅêÅõÅÊÊÊÊ Ê+Ê1Ê;ÊAÊLÊVÊÐgÊlÐwÊÐÊÊÐ¢Ð­Ð²Ð½ÐÃÐÍÐØÐÞÐéÐîÐùÐÐ	ÐÐÐ$Ð/Ð4Ð?ÐEÐOÐZÐ`ÐjÐpÐÐÐÐÐÐ¦Ð±Ð¶ÐÁÐÆÐÑÐÜÊáÐìÐòÊüÊÊÊÊÊ(Ê3Ê8ÊCÊHÊSÊ	úÀÀÀ"-ð	Â%_úúúúú©ú´ú¹úÉÄúÉú9ÔúxßúäúÃïúÝôúøÿúûûû' û-+û25û=;ûMFûWKûgVû|aûfûqûvû§û¬û±û·û¼¢û±¬û±·û¬½û±Çû±Íû¬Øû¡âû¡èûóûøûüüüü#ü.ü|9ü|>üwIürOürYüwdüwjü|uüwzüwü|üwüw üw¥ü|°ü|»üÀüËüÑüÛüæü¡ìü¬öü±üü·ý·ý¼ýÇ"ýÌ'ýÌ2ýÖ=ýÜBýáMýæRýæ]ýæhýñmýöxýü~ýüýýý£ý©ý´ý¿ýÄý!Ïý&Ôý+ßý+êý1ïý1úý6ÿý6þ;þ;þA%þA+þF6þK@þKFþPQþVVþVaþVlþ[qþ`|þ`þfþfþkþk§þp­þv·þvÂþÈþÒþØþãþîþóþþþÿÿÿÿ)ÿ.ÿ9ÿ Dÿ Iÿ¥Tÿ¥Zÿ¥eÿ«oÿ«uÿ«ÿ°ÿ°ÿ°ÿµ ÿµ«ÿ»°ÿ»»ÿ»ÆÿÀËÿÀÖÿÀÜÿÀæÿÅñÿÅ÷ÿÅÊÊÊÊ"Ê-Ð2Ð=ÐHÐMÕXÕ]ÕhÕsÚxÚÚÚÚÚ¤Ú¯à´à¿àÊàÏàÚàßàêàõåúåååå å&å0å6åAêKêQêêaêlêwê|êêêê¢ê§ð²ð¸ðÂðÍðÓðÝðãðîðùðþð	ððð$ð)ð4ð9ðDõOðUð_ðeðpðzõðõõð¦ð«ð¶õ»ðÆðÑðÖõáõçõñõüõõõðõ(õ-õ8õ=õHõSõXõcõhõsõ~õõõõõ©õ¯õºõ¿õÊõÕõÚõåõêðõðõõõõ õ+õ1õ;õAõLõVõõgõlõwõõõðð¢õ­õ²ð½ðÃðÍõØõÞðéõîõùðõ	õðõ$õ/õ4õ?ðEðOõZõ`õjõpðððõõõ¦ð±ð¶ðÁõÆõÑõÜðáðìõòðüõðððõ(õ3õ8õCðHðSõ	ú"-	ðÂ%_úúúúú©ú´ú¹úÉÄúÉú9ÔúxßúäúÃïúÝôúøÿúûû"û' û-+û25û=;ûMFûWKûgVû|aûfûqûvû§û¬û±û·û¼¢û±¬û±·û¬½û±Çû±Íû¬Øû¡âû¡èûóûøûüüüü#ü.ü|9ü|>üwIürOürYüwdürjü|uürzüwü|ürüw üw¥ü|°ü|»üÀüËüÑüÛüæü¡ìü¬öü±üü·ý·ý¼ýÇ"ýÌ'ýÌ2ýÖ=ýÜBýáMýæRýæ]ýæhýñmýöxýü~ýüýýý£ý©ý´ý¿ýÄý!Ïý&Ôý+ßý+êý1ïý1úý6ÿý6þ;þ;þA%þA+þF6þK@þKFþPQþVVþVaþVlþ[qþ`|þ`þfþfþkþk§þp­þv·þvÂþÈþÒþØþãþîþóþþþÿÿÿÿ)ÿ.ÿ9ÿ Dÿ Iÿ¥Tÿ¥Zÿ¥eÿ«oÿ«uÿ«ÿ°ÿ°ÿ°ÿµ ÿµ«ÿ»°ÿ»»ÿ»ÆÿÀËÿÀÖÿÀÜÿÅæÿÅñÿÅ÷ÿÅÊÊÊÊ"Ê-Ð2Ð=ÐHÐMÕXÕ]ÕhÕsÚxÚÚÚÚÚ¤Ú¯à´à¿àÊàÏàÚàßàêàõåúåååå å&å0å6åAêKêQêêaêlêwê|êêêê¢ê§ð²ð¸ðÂðÍðÓðÝðãðîðùðþð	ððð$ð)ð4ð9ðDõOðUð_õeðpðzõðõõð¦ð«ð¶õ»ðÆðÑðÖõáõçõñõüõõððõ(õ-õ8õ=õHõSõXõcõhõsõ~õõõõõ©õ¯õºõ¿õÊõÕõÚõåõêðõðõðõõ õ+õ1õ;õAõLõVõõgõlõwõõõðð¢õ­õ²ð½ðÃðÍõØõÞðéõîõùðõ	õðõ$õ/õ4ð?ðEðOõZõ`õjõpðõðõõõ¦ð±õ¶ðÁõÆõÑõÜðáðìõòðüõðððõ(õ3õ8õCðHðSõÂ%_úcúhúhúsúx©ú~´ú¹úÄúÉú£Ôú£ßú£äú¨ïú­ôú­ÿú¸û¸û¸û½ û¸+û¸5û³;û½FûÃKûÃVû½aû¸fû¸qûÃvûÃû¸û³û¸ûÃ¢û¸¬û³·û³½û­Çû£Íû¨Øû£âûèûóûøûüü~üü~#üx.üs9üh>ü^IücOü^YüXdüSjüXuüSzüSü^ühüx ü~¥ü~°ü»ü£Àü­Ëü³ÑüÃÛüÍæüÒìüÝöüâüüèýíýýý"ý'ý'2ý7=ýGBýRMýRýb]ýrhý|mýxý~ýýýý¡£ý¡©ý§´ý§¿ý¡Äý¡Ïý§Ôý§ßý¡êýïýúýÿýþþþ%þ+þ¡6þ¡@þ¡Fþ¬Qþ±Vþ±aþ·lþ¼qþÁ|þÇþÌþÑþÖþÜ§þÜ­þá·þìÂþìÈþñÒþöØþöãþüîþüóþüþþÿÿÿÿ)ÿ.ÿ9ÿDÿIÿTÿZÿeÿoÿuÿÿÿÿÿ ÿ«ÿ°ÿ»ÿÆÿËÿÖÿÜÿæÿñÿ÷ÿ"-2=HMX]hsx¤ü¯ü´ü¿üÊüÏöÚößöêöõñúööüü ü&06AKQalw|¢§²¸ÂÍÓÝãîùþü	üüü$ü)49DOU_&e+p6zAFPV[¦f«k¶p»vÆÑÖáçñü(- 8 =¥H¥S¥X¥c«h«s«~«««°°©°¯°º°¿°Ê°Õ°Úµåµêµõ°µµµµ µ+µ1µ;µAµL»V»»g»l»w»»»»»¢»­»²»½»Ã»Í»Ø»Þ»é»î»ù»»	ÀÀ»$À/À4»?»EÀO»Z»`ÀjÀp»»»»»»¦»±»¶»Á»Æ»Ñ»Ü»á»ì»ò»ü»»»»»(»3»8µC»HµSµ	ÿÿÿûqÿ"Helvetica-Narrow;-	ú"-xúxúúxúú'ú!0¥Öùxú'ú!22Öùxú'ú!4¿ÖùxúXXxúxú'ÿÿð	&TNPP--'ÿÿ&ÿÿÿÿ&ÿÿÿÿ÷Xùpi--ipXù÷&TNPP.	ÿÿÿ--üÿÿÿ-		ú"-Â%_úüýúüýúþúþ¤úþ¯úþºú'þ¿ú,þÊú7þÐúAþÚúGþåúQþëúaþõúaþûúfþûqþûqþûqþ!ûvþ&ûvþ1û|þ<ûvþAûvþLû|þQûqþqþgûqþlûlþwûfþ|ûaþûaþûWþûLþ¢ûLþ¨ûGþ²ûAþ½û<þÃû7þÍû1þÓû1þÞû1þèû1þîû,þùû,þþû'þ	ü,þü1þü,þ$ü'þ)ü,þ4ü1þ?ü7þDü7þOü7þTü7þ_üGþjüLþoüWþzüaþülþüvþüþüþ¥ü¡þ«ü±þ¶ü»þÀüÆþÆüÑþÑüÛþÖüæþáüðþìüöþñüÿüüÿýÿýÿýÿýÿ'ý ÿ,ý%ÿ7ý0ÿBý5ÿGý;ÿRý@ÿXýEÿbýEÿmýEÿsýPÿýPÿýUÿýUÿýUÿý[ÿ©ý[ÿ®ý`ÿ¹ý`ÿÄýeÿÉýeÿÔýjÿÙýpÿäýuÿïýzÿôýÿÿýÿþÿþÿþÿþÿ*þ¥ÿ0þªÿ:þ¯ÿEþµÿKþºÿUþ¿ÿ[þÅÿfþÏÿpþÏÿvþÕÿþÚÿþßÿþäÿþêÿ¡þêÿ¬þïÿ±þôÿ¼þôÿÇþúÿÌþÿÿ×þÿÿÜþçþòþ÷þÿÿÿÿ#ÿ-ÿ3ÿ>ÿHÿNÿYÿ$^ÿ$iÿ$tÿ$yÿ$ÿ)ÿ$ÿ$ÿ$¤ÿ$¯ÿ$´ÿ$¿ÿ$Êÿ$Ïÿ)Úÿ)àÿ)êÿ$õÿ)ûÿ)))/ /&/1/64A4L4Q49a9l9w9|9999¢?§?²9¸?Â?Í?Ó?Ý?ã?î?ø?þ9	999$9)94999D9O9T9_9d9o9z99999¥9«4µ4»4Æ4Ð4Ö4á4æ4ñ/ü/////'),)7)<)G$R$W$bhr¨®¹¾ÉÔÙäéôÿÿÿúÿúÿúÿ*ôÿ/ôÿ:ïÿ@ïÿJïÿUêÿ[êÿeäÿkäÿvßÿßÿßÿÚÿÚÿ¡Úÿ¬Õÿ±Õÿ¼ÏÿÁÏÿÌÊÿ×ÊÿÜÊÿçÅÿìÅÿ÷¿ÿ¿ÿ¿ÿºÿºÿ"ºÿ-µÿ3µÿ=¯ÿC¯ÿN¯ÿXªÿ^ªÿiªÿn¥ÿy¥ÿ¥ÿ¥ÿ¥ÿÿ¤¥ÿ¯¥ÿ´¥ÿ¿¥ÿÄ¥ÿÏ¥ÿÚªÿßªÿêªÿð¯ÿú¯ÿµÿºÿºÿ¿ÿ&Åÿ0Êÿ6ÏÿAÕÿFÚÿQßÿäÿaêÿlïÿqôÿ|úÿÿÿ§²·Â$È)Ò/Ý/ã4í9ó?þDDIOO)T4T9YDYI^T^Â%_úÂýúÝýú÷ýúþ¤ú'þ¯ú7þºúGþ¿úÊúfþÐú|þÚúþåúþëúþõú¦þûú«þû¶þû»þû»þ!ûÁþ&ûÆþ1ûËþ<ûËþAûËþLûËþQûËþËþgûÑþlûÑþwûÑþ|ûÑþûÑþûËþûËþ¢ûÑþ¨ûËþ²ûËþ½ûËþÃûËþÍûÑþÓûËþÞûËþèûËþîûËþùûËþþûËþ	üËþüËþüÆþ$üÆþ)üÆþ4üÆþ?üËþDüËþOüËþTüËþ_üÑþjüÖþoüÖþzüáþüáþüæþüëþüðþ¥üûþ«üÿ¶üÿÀüÿÆüÿÑüÿÖüÿáüÿìü ÿñü%ÿüü+ÿý0ÿý0ÿý5ÿý5ÿ'ý;ÿ,ý@ÿ7ýEÿBýKÿGýKÿRýPÿXýPÿbýPÿmýUÿsýUÿý[ÿý[ÿý`ÿý`ÿý`ÿ©ýeÿ®ýjÿ¹ýpÿÄýuÿÉýuÿÔýÿÙýÿäýÿïýÿôýÿÿýÿþªÿþ¯ÿþµÿþ¿ÿ*þÅÿ0þÊÿ:þÏÿEþÕÿKþÚÿUþßÿ[þäÿfþïÿpþïÿvþôÿþúÿþÿÿþþ¡þ¬þ±þ¼þÇþÌþ×þÜþ$çþ)òþ)÷þ/ÿ/ÿ/ÿ4ÿ4#ÿ9-ÿ93ÿ?>ÿ?Hÿ?NÿDYÿD^ÿDiÿItÿIyÿIÿIÿIÿIÿO¤ÿO¯ÿO´ÿO¿ÿOÊÿOÏÿTÚÿTàÿTêÿTõÿTûÿTTYY Y&Y1Y6^A^L^Q^dadldwd|dddi¢i§i²d¸iÂiÍiÓiÝiãiîiøiþi	iin$i)i4i9iDiOiTi_idioiziiiii¥i«iµi»iÆiÐiÖiáiæiñiüiiiii'i,d7d<dGdRdWdbdhdr^^^^^^¨Y®Y¹Y¾YÉYÔYÙTäTéTôTÿTOOOO*O/I:I@IJIUD[DeDkDvD????¡9¬9±9¼9Á4Ì4×4Ü4ç/ì/÷///))")-)3$=$C$N$X$^iny¤¯´¿ÄÏÚßêðú$$))&/0/6/A4F4Q99a?l?qD|DIIOO§T²T·YÂYÈ^Ò^Ý^ãdídóiþinnnt)t4t9tDyIyTyÂ%_úýú½ýúçýúþ¤ú7þ¯úWþºúqþ¿úþÊú¡þÐú±þÚúÁþåúÑþëúÛþõúæþûúëþûûþûÿûÿ!ûÿ&ûÿ1ûÿ<ûÿAûÿLûÿQû ÿ%ÿgû+ÿlû0ÿwû5ÿ|û5ÿû@ÿûEÿûEÿ¢ûPÿ¨ûPÿ²ûUÿ½û[ÿÃû`ÿÍûeÿÓûjÿÞûjÿèûjÿîûpÿùûpÿþûpÿ	üjÿüpÿüjÿ$üjÿ)üjÿ4üeÿ?üjÿDüeÿOü`ÿTü`ÿ_ü`ÿjü`ÿoü`ÿzü`ÿü[ÿü[ÿüUÿüUÿ¥üUÿ«üPÿ¶üPÿÀüKÿÆüKÿÑüKÿÖüKÿáüKÿìüKÿñüKÿüüPÿýPÿýPÿýPÿýUÿ'ýUÿ,ýUÿ7ý[ÿBý[ÿGý[ÿRý`ÿXý[ÿbý[ÿmý[ÿsý[ÿý[ÿý`ÿý`ÿýeÿýeÿ©ýjÿ®ýuÿ¹ýzÿÄýÿÉýÿÔýÿÙýÿäý¥ÿïýªÿôýµÿÿýºÿþÅÿþÊÿþÏÿþÚÿ*þßÿ0þäÿ:þêÿEþôÿKþôÿUþÿÿ[þÿÿfþpþvþþþþþ¡þ$¬þ)±þ)¼þ/Çþ4Ìþ4×þ9Üþ9çþ?òþD÷þDÿDÿIÿOÿO#ÿO-ÿT3ÿY>ÿYHÿYNÿYYÿ^^ÿ^iÿdtÿdyÿiÿiÿiÿiÿn¤ÿn¯ÿn´ÿt¿ÿtÊÿtÏÿtÚÿyàÿyêÿyõÿyûÿyy~~ ~&~1~6ALQalw|¢§²¸ÂÍÓÝãîøþ	$)49DOT_doz¥«µ»ÆÐÖáæñü',7<GRWbhr¨®¹¾ÉÔÙäéôÿ*/:@JU[ekv¡¬±¼ÁÌ×Üçì÷"-3=CNX^iny¤¯´¿ÄÏÚßêðú&06AFQalq|§²·ÂÈÒÝãíóþ)49DITÂ%_úýúÍýúòýúþ¤ú7þ¯úQþºúlþ¿ú|þÊúþÐú¡þÚú«þåú»þëúËþõúÑþûúÖþûáþûëþûëþ!ûðþ&ûöþ1ûûþ<ûÿAûÿLûÿQûÿÿgûÿlûÿwûÿ|û ÿû%ÿû%ÿû+ÿ¢û5ÿ¨û;ÿ²û;ÿ½û@ÿÃû@ÿÍûEÿÓûEÿÞûKÿèûKÿîûKÿùûKÿþûKÿ	üKÿüPÿüKÿ$üKÿ)üKÿ4üKÿ?üKÿDüEÿOüEÿTüEÿ_üEÿjüEÿoüEÿzüEÿüEÿüEÿüEÿü@ÿ¥üEÿ«üEÿ¶ü@ÿÀü@ÿÆüEÿÑüEÿÖüEÿáüEÿìüEÿñüEÿüüKÿýPÿýKÿýPÿýPÿ'ýPÿ,ýUÿ7ý[ÿBý[ÿGý[ÿRý[ÿXý[ÿbý[ÿmý[ÿsý[ÿý`ÿý`ÿý`ÿýeÿýeÿ©ýjÿ®ýuÿ¹ýzÿÄýÿÉýÿÔýÿÙýÿäýÿïý¥ÿôýªÿÿýµÿþ¿ÿþÅÿþÊÿþÕÿ*þÚÿ0þßÿ:þäÿEþêÿKþïÿUþôÿ[þúÿfþÿÿpþvþþþþþ¡þ¬þ$±þ$¼þ)Çþ/Ìþ/×þ4Üþ9çþ?òþ?÷þ?ÿDÿDÿIÿI#ÿO-ÿO3ÿT>ÿTHÿYNÿYYÿY^ÿ^iÿ^tÿ^yÿdÿdÿdÿdÿi¤ÿi¯ÿi´ÿn¿ÿnÊÿnÏÿnÚÿnàÿnêÿnõÿtûÿtttt t&y1y6yAyLyQy~a~l~w~|~~~~¢§²¸ÂÍÓÝãîøþ	$)49DOT_doz¥«µ»ÆÐÖáæñü',7<GRWbhr¨®¹¾ÉÔÙä~é~ô~ÿ~~~~~*~/~:~@~J~U~[~e~k~v~y~yy¡y¬y±y¼yÁyÌy×yÜyçyìy÷yyyyt"y-y3y=tCtNyXt^titntyttttt¤t¯t´t¿tÄtÏtÚtßtêtðtútttty&y0y6yAyFyQyyaylyqy|~~~~~§~²~·~Â~È~Ò~Ý~ãíóþ)49DIT	ÿÿÿûqÿ"Helvetica-Narrow;-	ú"-ú#ýúú.ú!09Ýùÿúÿ.ú!2ÆþÝù§ýú§ý.ú!4SýÝùúY#ýY#ýúú'ÿÿð&TNPP--'ÿÿ&ÿÿÿÿ&ÿÿÿÿ÷ìõpý--ýpìõ÷&TNPP.	ÿÿÿ--üÿÿÿ-	ú"-Â%_ú¦úúËúúÕúúåú¤úõú¯úûºú û¿ú0ûÊú5ûÐú?ûÚúEûåúEûëúOûõúZûûúZûûeûû_ûûeû!ûjû&ûzû1ûzû<ûûAûzûLûûQûûûgûûlûûwûû|ûûû¤ûû¯ûû¯û¢û´û¨û´û²û´û½û´ûÃû¹ûÍû´ûÓû´ûÞû¿ûèû´ûîû´ûùû¹ûþû¹û	ü´ûü´ûü´û$ü¯û)ü´û4ü¯û?ü¯ûDü¯ûOü¯ûTü¯û_ü¯ûjüªûoü´ûzü´ûü´ûü´ûü¹ûü¿û¥üÄû«üÄû¶üÉûÀüÏûÆüÏûÑüÔûÖüßûáüßûìüäûñüäûüüäûýéûýéûýïûýïû'ýôû,ýü7ýüBý	üGýüRýüXýübýümý$üsý$üý$üý.üý3üý9üý>ü©ýCü®ýCü¹ýNüÄýSüÉýSüÔýYüÙý^üäýcüïýiüôýiüÿýnüþsüþxüþxüþ~ü*þ~ü0þü:þüEþüKþüUþü[þüfþüpþüvþ£üþ¨üþ¨üþ®üþ³ü¡þ³ü¬þ¸ü±þ¸ü¼þ½üÇþÃüÌþÃü×þÃüÜþÈüçþÈüòþÍü÷þÓüÿÓüÿØüÿØüÿØü#ÿÝü-ÿÝü3ÿÝü>ÿãüHÿãüNÿãüYÿèü^ÿèüiÿèütÿèüyÿíüÿíüÿíüÿòüÿòü¤ÿòü¯ÿòü´ÿøü¿ÿòüÊÿøüÏÿøüÚÿýüàÿýüêÿýüõÿýüûÿýýýý ý&ý1ý6ýAýLýQýýaýlýwý|ýýýý¢ý§ý²ý¸ýÂýÍýÓýÝýãýîýøýþý	ýýý$ý)ý4ý9ýDýOýTý_ýdýoýzýýýýý¥ý«ýµý»ýÆýÐýÖýáýæýñýüýýýýý'ý,ý7ý<ýGýRýWýbýhýrýýýýýý¨ý®ý¹ý¾ýÉýÔýÙýäýéýôýÿýýýýý*ý/ý:ý@ýJýUý[ýeýkývýýýýý¡ý¬ý±ýü¼ýüÁýüÌýü×ýüÜýüçýüìýü÷ýüøüøüøüøü"øü-øü3øü=øüCøüNøüXøü^øüiøünòüyòüøüøüøüøü¤øü¯øü´øü¿øüÄøüÏøüÚøüßøüêøüðýüúýüýüýüýüýü&ý0ý6ýAýFýQýýaýlýqý|ýýýýý§ý²ý·ýÂýÈýÒýÝýãýíýóýþýýýýý)ý4ý9ýDýIýTýÂ%_úúúúú úú«ú¤úËú¯úÐúºúÛú¿úûÊúûÐúûÚúûåú%ûëú*ûõú:ûûú*ûû:ûû:ûû5û!û0û&ûOû1ûOû<ûOûAûOûLûUûQûJûEûgûJûlû?ûwû?û|ûEûû:ûû0ûû5û¢û5û¨û5û²û0û½û*ûÃû?ûÍû0ûÓû0ûÞû0ûèû*ûîû*ûùû*ûþû*û	ü*ûü%ûü û$ü*û)ü0û4ü0û?ü5ûDü:ûOü:ûTü:û_ü?ûjüEûoüUûzüZûüZûüjûüuûüzû¥üû«üû¶üûÀüûÆüªûÑüªûÖüªûáü¯ûìü´ûñü¹ûüü¿ûýÉûýÄûý¿ûýÔû'ýäû,ýäû7ýéûBýïûGýôûRýôûXýùûbýþûmý	üsý	üý	üýüýüýüýü©ý$ü®ý$ü¹ý)üÄý.üÉý3üÔý9üÙý>üäýCüïýCüôýNüÿýSüþYüþ^üþ^üþcü*þiü0þnü:þsüEþxüKþ~üUþü[þüfþüpþüvþüþüþüþüþü¡þü¬þ£ü±þ¨ü¼þ¨üÇþ®üÌþ³ü×þ³üÜþ³üçþ¸üòþ½ü÷þ½üÿ½üÿ½üÿÃüÿÃü#ÿÈü-ÿÈü3ÿÈü>ÿÍüHÿÍüNÿÍüYÿÍü^ÿÍüiÿÍütÿÍüyÿÓüÿÓüÿÓüÿÓüÿÓü¤ÿÓü¯ÿÓü´ÿÓü¿ÿÓüÊÿØüÏÿØüÚÿØüàÿØüêÿÝüõÿÝüûÿÝüãüãüãü ãü&èü1èü6èüAèüLíüQíüíüaíülíüwíü|íüíüíüíü¢íü§íü²íü¸íüÂíüÍíüÓíüÝíüãíüîíüøíüþíü	íüíüòü$íü)òü4íü9òüDòüOòüTòü_òüdòüoòüzòüòüòüòüòü¥òü«òüµòü»òüÆíüÐíüÖíüáíüæíüñíüüèüèüèüèüèü'èü,èü7ãü<ãüGãüRãüWÝübÝühÝürÝüÝüØüØüØüØü¨Óü®Óü¹Óü¾ÍüÉÍüÔÍüÙÍüäÈüéÈüôÃüÿÃüÃüÃü½ü½ü*½ü/¸ü:¸ü@¸üJ¸üU³ü[³üe³ük®üv®ü®ü®ü¨ü£ü¡¨ü¬£ü±£ü¼£üÁüÌü×üÜüçüìü÷üüüüü"ü-ü3ü=üCüNüXü^üiünüyüüüüü¤ü¯ü´ü¿üÄüÏüÚüß£üê£üð¨üú®ü³ü³ü¸ü½ü&½ü0Ãü6ÈüAÈüFÍüQÍüÓüaØülÝüqÝü|ãüãüèüíüíü§òü²òü·òüÂøüÈøüÒøüÝýüãýüíýóýþýýýýý)ý4ý9ýDýIýTýÂ%_úúúvúúúúú¤úú¯ú«úºú°ú¿úÐúÊúÕúÐúàúÚúðúåúúúëúûõúúúûúûûûûûûû!ûû&û%û1û*û<û ûAû%ûLû ûQûûûgûûlûûwûû|ûûûûûðúûàú¢ûåú¨ûåú²ûÕú½ûÐúÃûÛúÍûÛúÓûÕúÞûÐúèûÕúîûÕúùûÅúþûËú	üÕúüËúüËú$üÐú)üÕú4üÛú?üÛúDüåúOüúúTüðú_üûjüûoüûzü ûü*ûü?ûüEûüUû¥ü_û«üeû¶üjûÀüzûÆüûÑüûÖüûáüûìü¤ûñüªûüüûý¯ûý¹ûý¹ûýÉû'ýÉû,ýÏû7ýÙûBýÙûGýäûRýäûXýéûbýïûmýôûsýôûýïûýôûýùûýüýü©ýü®ý	ü¹ýüÄýüÉýüÔýüÙý$üäý)üïý.üôý3üÿý9üþ>üþCüþIüþNü*þNü0þYü:þ^üEþcüKþiüUþiü[þnüfþxüpþxüvþ~üþüþüþüþü¡þü¬þü±þü¼þüÇþüÌþ£ü×þ£üÜþ£üçþ¨üòþ®ü÷þ®üÿ³üÿ³üÿ¸üÿ¸ü#ÿ¸ü-ÿ¸ü3ÿ½ü>ÿ½üHÿ½üNÿ½üYÿ½ü^ÿ½üiÿ½ütÿ½üyÿ½üÿ½üÿ½üÿ½üÿ½ü¤ÿ½ü¯ÿ½ü´ÿ½ü¿ÿ½üÊÿ½üÏÿÃüÚÿÃüàÿÃüêÿÃüõÿÈüûÿÈüÍüÍüÍü Óü&Óü1Óü6ÓüAØüLØüQØüØüaØülØüwØü|ØüØüØüØü¢Øü§Óü²Óü¸ÓüÂÓüÍÓüÓÓüÝÓüãÓüîÓüøÓüþÓü	ÓüÓüÓü$Óü)Óü4Óü9ÓüDÓüOÓüTÓü_ÓüdÓüoÓüzÓüÓüÓüÓüÓü¥Óü«ÓüµÓü»ÓüÆÍüÐÍüÖÍüáÈüæÈüñÈüüÃüÃüÃü½ü½ü'½ü,½ü7¸ü<¸üG¸üR¸üW³üb³üh³ür®ü®ü¨ü¨ü£ü£ü¨£ü®£ü¹ü¾üÉüÔüÙüäüéüôüÿüüüüü*ü/~ü:~ü@xüJxüUsü[süenüknüvnüiüiücü^ü¡^ü¬^ü±Yü¼YüÁSüÌSü×SüÜNüçNüìNü÷IüIüCüCüCü"Cü->ü3>ü=>üC9üN9üX9ü^9üi9ün9üy>ü>ü>üCüCü¤Iü¯Iü´Nü¿NüÄSüÏYüÚ^üßcüêiüðnüúsüxü~üüü&ü0ü6üA£üF£üQ¨ü³üa³ül½üqÃü|ÃüÈüÍüÓüÓü§Øü²Ýü·ãüÂãüÈèüÒíüÝíüãòüíòüóòüþøüøüýüýüýü)ý4ý9ýDýIýTýÂ%_úÀúúÕúúëúúúú¤úû¯úûºú*û¿ú5ûÊúEûÐúUûÚúZûåú_ûëújûõúuûûúuûûzûûûûû!ûzû&ûû1ûªû<ûûAû¤ûLûûQûªûªûgû¯ûlû¹ûwû¿û|ûÉûûÏûûÏûûÔû¢ûßû¨ûßû²ûéû½ûäûÃûéûÍûéûÓûïûÞûéûèûéûîûéûùûäûþûäû	üïûüäûüéû$üäû)üßû4üßû?üßûDüÙûOüßûTüäû_üÙûjüÙûoüÔûzüÔûüÏûüÔûüÔûüÔû¥üßû«üÙû¶üßûÀüäûÆüéûÑüïûÖüïûáüôûìüùûñüôûüüùûýþûýùûýüý	ü'ý	ü,ýü7ýüBýüGýüRý$üXý$übý.ümý3üsý9üý9üýCüýIüýNüýSü©ýSü®ý^ü¹ýcüÄýiüÉýiüÔýnüÙýsüäýxüïýxüôý~üÿýüþüþüþüþü*þü0þü:þüEþüKþ£üUþ¨ü[þ¨üfþ®üpþ³üvþ³üþ¸üþ¸üþ½üþÃü¡þÃü¬þÈü±þÈü¼þÍüÇþÍüÌþÓü×þÓüÜþÓüçþØüòþÝü÷þÝüÿãüÿãüÿèüÿèü#ÿèü-ÿíü3ÿíü>ÿíüHÿòüNÿòüYÿøü^ÿøüiÿøütÿýüyÿýüÿýüÿýÿýÿý¤ÿý¯ÿý´ÿý¿ÿýÊÿýÏÿýÚÿýàÿýêÿýõÿýûÿýýýý ý&ý1ý6ýAýLýQýýaýlýwý|"ýý"ýý¢ý§"ý²"ý¸"ýÂ"ýÍ"ýÓ"ýÝ"ýã"ýî"ýø"ýþ"ý	"ý"ý"ý$"ý)"ý4"ý9"ýD"ýO"ýT"ý_"ýd"ýo"ýz"ý"ý"ý"ý"ý¥"ý«"ýµ"ý»"ýÆ"ýÐ"ýÖ"ýá"ýæ"ýñ"ýü"ý"ý"ý"ý"ý'"ý,"ý7"ý<"ýG"ýR"ýW"ýb"ýh"ýr"ý"ý"ý"ý"ý"ý¨"ý®"ý¹"ý¾"ýÉ"ýÔ"ýÙ"ýä"ýé"ýô"ýÿ"ý"ý"ý"ý"ý*"ý/"ý:"ý@"ýJ"ýU"ý["ýe"ýk"ýv"ý"ý"ý"ý"ý¡"ý¬"ý±"ý¼"ýÁ"ýÌ"ý×"ýÜ"ýç"ýì"ý÷"ý"ý"ý"ý"ý""ý-"ý3"ý="ýC"ýN"ýX"ý^"ýi"ýn"ýy"ý"ý"ý"ý"ý¤"ý¯"ý´"ý¿"ýÄ"ýÏ"ýÚ"ýß"ýê"ýð"ýú"ý"ý"ý"ý"ý&"ý0"ý6"ýA"ýF"ýQ"ý"ýa"ýl"ýq"ý|"ý"ý"ý"ý"ý§"ý²"ý·"ýÂ"ýÈ"ýÒ"ýÝ"ýã"ýí"ýó"ýþý"ý"ý"ý"ý)"ý4"ý9"ýD"ýI"ýTý	ÿÿÿûqÿ"Helvetica-Narrow;-	ú"-(ýú·ùú"ýú"ý.ú!0ÍüÝù0ûú0û.ú!2ÛúÝù(ýú(ýY·ùY·ùú(ýú'ÿÿð&TNPP--'ÿÿ&ÿÿÿÿ&ÿÿÿÿªýñ^à	ûpÿ"ArialNe-.	2	äýWavelength / nmPHP PPP(P(((Qw&ÿÿÿÿ&ÿÿÿÿ'øþOùû@ÿSymbolK-ð.	2Áñøe T0ûpÿ"ArialNe-ð	2=ñøx 10H(PPû ÿ"ArialK-ð	2-Æø-4 5ûpÿ"ArialNe-ð	2Øñø / M(((xû ÿ"ArialK-ð	2èÿÆø-1 5ûpÿ"ArialNe-ð	2ÿñø cm(Hxû ÿ"ArialK-ð	2«þÆø-1 5&ÿÿÿÿ&ÿÿÿÿöÚþ®--û¼"Systemn-ð®V	ú"-röö--ð'ÿÿü-$öÙÓPP&ÿÿÿÿ&ÿÿÿÿ¶¾ð--ðð^X	ú"-´¶P¶--ð'ÿÿü-$¶Ù&ÿÿÿÿ&ÿÿÿÿübü6--ð66ýîû	ú"-úüü--ð'ÿÿü-$üaküØ±üØ&ÿÿÿÿ&ÿÿÿÿzþTÿ--ðTÿ"¼þÚ	ú"-z´ýz--ð'ÿÿü-$zþWöþöþ&ÿÿÿÿ&ÿÿÿÿ"ü6ý*üþ--ðþÊürýû	ú"-Îþ"üjü"ü--ð'ÿÿü-$"ü5ýÿû¬ýEü¬ý&ÿÿÿÿ&ÿÿÿÿbûjâû--ðâûJûÂ	ú"-¦übBúb--ð'ÿÿü-$bû?ûû&ÿÿÿÿ&ÿÿÿÿüúüÔú--ðÔú*ý<úâû	ú"-ûü4ùü--ð'ÿÿü-$üÿù_üvú¥üvú&ÿÿÿÿ&ÿÿÿÿ&ÿÿÿÿ0ÿîûpÿ"ArialK-.	2j(d)0P0&ÿÿÿÿ&ÿÿÿÿ6Zûpÿ"ArialNe-ð.	22p(c)0H0&ÿÿÿÿ&ÿÿÿÿ0'ýþûpÿ"ArialK-ð.	2Æýj(b)0P0&ÿÿÿÿ&ÿÿÿÿ0»ùªúûpÿ"ArialNe-ð.	2Zúj(a)0P0&ÿÿÿÿ&ÿÿÿÿ&TNPP&ÿÿÿÿ--ð-ð
Figure S3. Changes in the electronic absorption spectra of:  (a) 9;  (b) 10;  (c) 11; (d) 12;  in CH2Cl2 solution upon electrochemical reduction.  Arrows indicate spectral changes on stepping through  0.0V to - 0.8 V; applied potentials versus SCE.


ý¨þý¨þý±þý±þý¸þý±þý±þý±þý¸þ£ý±þ¦ý¸þªý±þ¯ý¸þ³ý¸þ¶ý±þ»ý¸þ¿ý¸þÂý¸þÇý¸þËý¸þÐý±þÓý¸þ×ý¸þÜý¸þßý¸þãý±þèý±þìý±þïý±þôý±þøý±þûý±þþ±þþ±þ	þ±þþ±þþ±þþ¨þþ¨þþ¨þ!þ þ%þþ(þþ-þþ1þþ6þþ9þþ=þþBþþEþþIþþNþþRþþUþþZþþ^þþaþþfþþjþþoþþrþoþvþgþþgþ~þgþþgþþgþþgþþoþþxþþxþþxþþxþ£þxþ¨þxþ«þoþ¯þoþ´þoþ¸þoþ»þgþÀþoþÄþoþÇþoþÌþoþÐþxþÕþxþØþxþÜþxþáþxþäþxþèþxþíþþñþþôþþùþþýþþÿþÿxþ	ÿxþÿxþÿxþÿoþÿoþÿgþ!ÿgþ&ÿ`þ*ÿWþ-ÿFþ2ÿ?þ6ÿ'þ;ÿþ>ÿþýBÿîýGÿÝýJÿÝýNÿæýSÿõýWÿþZÿþ_ÿ'þcÿ.þfÿ.þkÿ7þoÿ.þtÿ.þwÿ'þÿ'þÿþÿþÿþýÿîýÿÅýÿ­ýÿýÿýÿmý¤ÿmý¨ÿmý­ÿtý°ÿý´ÿý¹ÿý½ÿ¤ýÀÿ¤ýÅÿýÉÿýÌÿ|ýÑÿmýÕÿÚÿSýÝÿdýáÿtýæÿýéÿÅýíÿÝýòÿîýöÿþùÿþþÿ'þ7þ7þ?þFþWþ`þgþgþ"xþ&xþ+þ/þ2þ7þ;þ@þCþGþLþOþSþXþþ_þdþhþkþpþtþyþ|þþ þ þ þ þ þ þ þ¡ þ¤ þ© þ­ þ²þµþ¹þ¾þÂþÅþÊþÎþÑþÖþÚþßþâþæþëþîþòþ÷þûþþþþþþþþþþþ$þ'þ+þ0þ4þ7þ<þ@ þE þH þLþQþTþXþ]þaþdþixþmgþpOþu7þyþ~þþýîýæýæýæýîýþ.þ¢?þ¦Oþ©oþ®xþ²þ·þºþ¾þÃþÇþÊþÏþÓ þÖ þÛ þß þä¨þç¨þë þð þó¨þ÷¨þü¨þ þ¨þ¨þ¨þ¨þ þ¨þ¨þ ¨þ$¨þ)¨þ,¨þ0 þ5 þ9 þ< þA þE þJ þM þQ þV þY þ] þbþfþi þnþrþuþz þ~þ þ þ þ þ þ þ¨þ¨þ¢¨þ§¨þ«¨þ®¨þ³¨þ·¨þ¼¨þ¿¨þÃ¨þÈ¨þÌ¨þÏ¨þÔ¨þØ¨þÛ¨þà±þä¨þé¨þì¨þð¨þõ¨þø¨þü±þ¨þ¨þ¨þ¨þ¨þ¨þ¨þ¨þ"¨þ%¨þ)¨þ.¨þ1¨þ5 þ:¨þ> þA¨þF¨þJ¨þO¨þR¨þV¨þ[¨þ^¨þb¨þg¨þk¨þn¨þs±þw¨þz±þ¨þ¨þ±þ¨þ¨þ¨þ¨þ¨þ ¨þ¤¨þ§¨þ¬¨þ°¨þ³¨þ¸¨þ¼¨þÁ¨þÄ þÈ þÍ þÑ þÔ þÙþÝþàþåþéþîþñþõþúþýþþþþþþþþþ"þ'þ*þ.þ3þ6þ:xþ?xþCxþFoþKgþO`þT`þW`þ[Wþ`WþcWþg`þlgþpgþsoþxxþ|þþ&ÿÿÿÿ&ÿÿÿÿ&ÿÿÿÿÌûDÿ&ÿÿÿÿêþÿÿÕû ÿzz"Arialª-ð.	2¡Xÿ14435656&ÿÿÿÿ&ÿÿÿÿélÿ¢û ÿ"ArialE-ð.	2nV13335656&ÿÿÿÿ&ÿÿÿÿZ¢ÿØû ÿ"Arialª-ð.	2¤Ç13175656&ÿÿÿÿ&ÿÿÿÿûÿDÿ¤zû ÿ"ArialE-ð.	2Fh14085656&ÿÿÿÿ&ÿÿÿÿÌûH%"Ìû<Ñû<ÕûDÚû3Ýû3áû,æû,êû,íû#òû,öû,ùû3þû<ü<ü<ü3ü<ü<üDü<ü3#ü3&ü3+ü</ü34ü37ü3;ü3@ü<Dü<Gü<LüDPü<Uü<Xü<DaüKdüDhü<müDqüDtüKyüKüKüKü<üDüDüKüDüDüD¡üD¦üKªüT¯üK²üK¶üK»üT¾üKÂüKÇüTËüKÎüTÓüK×üKÜüKßüKãüKèüKìüKïüTôüKøüDûüKýDýD	ýDýKýKýKý<ýD!ýK%ýK(ý<-ý31ý36ý39ý<=ýDBý<Fý<Iý3NýDRýKWýDZý<^ý<cýDfýKjýDoýDsý3vý3ý3ý<ý,ý#ý3ý#ýý#ý, ý,£ý,¨ý#¬ý,±ý,´ý3¸ý3½ý,Àý,Äý3Éý3Íý3Ðý#Õý,Ùý3Þý3áý,åý,êý#îý,ñý,öý,úý3ýý#þ,þ3þ3þ,þ,þ,þ3þ,#þ,'þ,*þ,/þ,3þ#8þ,;þ,?þ,Dþ,HþKþ#Pþ#Tþ#Wþ`þeþhþlþqþuþxþþ#þ#þ#þ#þ,þ3þ,þ#þ,¢þ#¥þ#ªþ,®þ,³þ,¶þ#ºþ#¿þ#Âþ,Æþ#ËþÏþ#Òþ,×þ#Ûþàþ#ãþ#çþ#ìþ#ðþ#óþøþüþÿþ#ÿÿÿÿÿÿÿ ÿ%ÿ)ÿ,ÿ1ÿ5ÿú:ÿë=ÿÒAÿÃFÿ²Jÿ©MÿºRÿÃVÿÃYÿÊ^ÿÛbÿâgÿâjÿÛnÿÒsÿÒwÿÒzÿÊÿ²ÿ©ÿÿÿÿiÿ@ÿ0 ÿ!¤ÿ§ÿ¬ÿ(°ÿ0µÿ@¸ÿX¼ÿiÁÿrÄÿyÈÿÍÿ¢Ñÿ©Ôÿ²Ùÿ²ÝÿºâÿºåÿºéÿÃîÿÃñÿÃõÿÃúÿÊþÿÒÛÛÛâëóúó"'+.37#<?#C,H,L,O,T3X3[3`,d3i<l3p,u,y3|33333,,33¢3¦3©,®3²3·,º#¾,Ã,Æ,Ê3Ï,Ó,Ö3Û,ß,ä#ç#ë#ðó÷üúóóóëë!â$â)Ê-º0©59>AyEyJNQ¢V²Zº]ÃbÒfÛkânârÛwÛÒ~Êº©©²²ºÃÛ¤â¨â«ó°ó´ë¹ë¼âÀâÅÛÈâÌÛÑâÕëØëÝëáâæëéëíúòóõúùþ#&+/27;@CGLPSX_dhmptyú¡¦ª­²¶»¾ÂÇÊÎÓ×Úßãèëï#ô÷û#!#$(-149=BEINRUZ^afjorv#£#¨¬¯´¸½#ÀÄÉÌÐÕÙÜáåêíñöùý	#&*/36;?úDúGóKëPâTÛWÛÊ`ÒcÒhÊlÒqÒtÛxÛëëó&ÿÿÿÿ&ÿÿÿÿ&ÿÿÿÿ½û^é&ÿÿÿÿlüDýzû ÿ"Arialª-ð.	2FÙü15925656&ÿÿÿÿ&ÿÿÿÿiþÿ;û ÿ"ArialE-ð.	2Öþ14775656&ÿÿÿÿ&ÿÿÿÿ­þãÿ+û ÿ"Arialª-ð.	2ïÙþ14465656&ÿÿÿÿ&ÿÿÿÿ]y"û ÿ"ArialE-ð.	2æ14015656&ÿÿÿÿ&ÿÿÿÿg^û ÿ"Arialª-ð.	2Ë13165656&ÿÿÿÿ&ÿÿÿÿ½ûé`%.½ûÙÂûÉÆûÙÉûÉÎûÐÒûÐÕûÐÚûÉÞûÐãûÐæûÐêûÐïûÐòûÐöûÉûûÉþûÉüÉüÉüÀüÀüÀüÀü¸ü¸#üÀ(üÀ+üÀ/üÀ4üÀ7üÀ;üÀ@üÀDüÀGüÀLüÉPüÀSüÀXüÀÀ_üÀdü¸hü¸mü¸pü¸tü¸yü¸|üÀüÀüÀüÀü¸ü¸üÀüÀü¯¡ü¯¦ü©ü­ü²üµü~¹üv¾ümÁümÅüvÊü~ÎüÑüÖüÚüÝüâüæü¨ëü¨îü¨òü÷üúüþüýýýý¨ý¨ý¨ý¨ý¨"ý¨'ý¯+ý¯0ý¯3ý¯7ý¸<ý¸?ýÀCýÀHý¸LýÀOýÀTý¸XýÀ[ýÀ`ý¯dý¯gýÀlý¸pýÀuý¸xý¯|ý¯ý¸ý¯ý¯ý¯ý¯ý¯ý¯ý¯ ý¯¥ý¯©ý¨¬ý¨±ý¯µý¯ºý¸½ý¸ÁýÀÆýÀÉýÀÍýÀÒýÀÖýÀÙýÀÞýÉâýÉåýÉêýÉîýÐóýÉöýÉúýÀÿýÉþÐþÐþÉþÉþÐþÐþÉþÉ#þÐ'þÉ*þÐ/þÙ3þÉ8þÀ;þÙ?þáDþÐGþÐKþÙPþÙSþÙWþÙÐ`þÐcþÐhþÐlþÐoþÐtþÉxþÐþÐþÐþÐþÐþÉþÉþÉþÉþÀ¡þÀ¥þ¨¨þ¨­þ±þ´þ~¹þv½þfÂþ]Åþ]Éþ]Îþ]Ñþ]ÕþvÚþ~Þþáþæþ¯êþ¯íþ¯òþ¯öþ¯ûþ¯þþ¸ÿ¸ÿÀÿÀÿÀÿÀÿÀÿÀÿÀ#ÿÀ&ÿ¯+ÿ¨/ÿ2ÿ7ÿ];ÿU@ÿëCÿÑGÿ_LÿVOÿ>SÿOXÿ°[ÿÊ_ÿ$dÿ-hÿUkÿfpÿ]tÿ]wÿf|ÿfÿmÿmÿ~ÿÿÿÿÿ¡ÿ¤ÿ©ÿ~­ÿv°ÿmµÿm¹ÿm¼ÿmÁÿfÅÿfÊÿfÍÿfÑÿ]Öÿ]ÙÿfÝÿfâÿmæÿféÿLîÿLòÿ-õÿ$úÿþÿÁ¹pgËº"'ª+>.O3Á7Ñ:?-CLHUKvOvTW[`c¯g¯l¸p¸s¸x¸|ÀÀÀÀÀÀÀÀÀ ¸¥¸¨¸¬¸±Àµ¸¸¸½¸Á¸ÄÀÉÀÍÀÒÀÕ¯Ù¯Þ¯á¨å¨ê¨îñöúý¯¯¯	¯¸¸¯¯¨#¨&*/3¨6¨;¨?¯B¯G¸K¸P¸S¸W¸¸_¸c¸h¯k¯o¯t¯x¯¯¨¨~~=$w_¡¤¨p­°´-¹m½vÀÅÉ¯Ì¸Ñ¯Õ¸ÚÀÝ¸áÀæÀéÉíÉòÀöÀùÀþÀÀÀÀÀÀÀÉÉ"É&É+É.É2À7À;À>ÀCÉGÉJÉOÀSÉVÉ[É_ÉdÀgÀkÀpÀs¸w¸|ÀÀÀÀÀÉÀÀ¸ À¤À©À¬À°ÀµÀ¸À¼ÀÁÀÅÀÈÀÍÉÑÉÔÉÙÀÝÀâÀåÉéÉîÉñÉõÉúÉþÐÐÐÉÉÐÉÉÐ"Ð'É*É.Ð3Ð6É:É?ÐCÉFÐKÐOÐRÐWÐ[Ð^ÐcÉgÐlÐoÉsÉxÉÀÉÉÉÉÉÉÉÉ É¥É¨É¬É±Ð´É¸Ð½ÐÀÐÄÐÉÉÍÉÐÉÕÉÙÉÜÉáÐåÐêÐíÐñÉöÉùÐýÉÐÐ	ÉÉÐÐÉÉ!É&É*À/À2À6À;À>ÀBÉGÀKÉNÉSÉWÉZÉ_ÉcÉfÉkÉoÉtÉwÉÉÉÉÀÉÉÉ&ÿÿÿÿ&ÿÿÿÿ&ÿÿÿÿ&ÿÿÿÿý¯¤ûpÿ"ArialE-ð.	2HËýRaman Shift / cmhPxPP(`P (((((Hxû ÿ"Arialª-ð	2-1 5&ÿÿÿÿ&ÿÿÿÿMúPý0ûÈÿûpÿ"ArialE-ð.	2ÿæú	Intensity(P(PPH (H&ÿÿÿÿ&ÿÿÿÿûfn	úÿÿÿ"--ðû¼"Systemn-ðÆû	ú"-fòf--ð'ÿÿ&ÿÿÿÿ&ÿÿÿÿüfü¯--¯(ýfàû	ú"-%üèü--ð'ÿÿ&ÿÿÿÿ&ÿÿÿÿÏûtÿýwûxÿ"Arialª-.	2&ü 1600 &KLLK&&ÿÿÿÿ&ÿÿÿÿKþfSþ¯---ð¯óþf«ý	ú"-%KþèKþ--ð'ÿÿ&ÿÿÿÿ&ÿÿÿÿýtÊÿwûxÿ"Arialª-.	2ñý 1500 &KLLK&&ÿÿÿÿ&ÿÿÿÿf¯---ð¯¾fvÿ	ú"-%è--ð'ÿÿ&ÿÿÿÿ&ÿÿÿÿeÿtwûxÿ"Arialª-.	2¼ÿ 1400 &KLLK&&ÿÿÿÿ&ÿÿÿÿßfç¯---ð¯f?	ú"-%ßèß--ð'ÿÿ&ÿÿÿÿ&ÿÿÿÿ.t^wûxÿ"Arialª-.	2 1300 &KLLK&&ÿÿÿÿ&ÿÿÿÿªf²¯---ð¯Rf	ú"-%ªèª--ð'ÿÿ&ÿÿÿÿ&ÿÿÿÿùt)wûxÿ"Arialª-.	2P 1200 &KLLK&&ÿÿÿÿ&ÿÿÿÿûÑ÷n	ú"-%ûffÑ÷ûÑ÷ûf&ÿÿÿÿ&ÿÿÿÿùcø|ùûXÿ"ArialE-ð.	2'ùP(a)8]8&ÿÿÿÿ&ÿÿÿÿùü|GýûXÿ"Arialª-ð.	2áüP(b)8]8&ÿÿÿÿ&ÿÿÿÿþkÿxûXÿ"ArialE-ð.	2/U(c)8T8&ÿÿÿÿ&ÿÿÿÿù|+ûXÿ"Arialª-ð.	2ÅP(d)8]8&ÿÿÿÿ&ÿÿÿÿ&TNPP&ÿÿÿÿ--ð-ð

Figure S4.  Resonance Raman spectra of:  (a)  5; (b) 6; (c) 7; (d) 8 in CH2Cl2 solution (1 mM), exc.= 457.9 nm continuous wave, laser power 20 mW.

þþt	þtþlþcþþKþD"þ,%þ#*þ.þ3þú6þú:þó?þóBþâFþâKþÛOþÒRþºWþ²[þ¢`þcþgþlþyoþysþixþi|þQþIþIþIþQþXþiþyþ¢ þ©¥þÁ©þÊ¬þê±þóµþºþ½þ#Áþ,Æþ;ÊþDÍþÒþcÖþÙþÞþâþçþêþ¥îþ­óþ­÷þ­úþ­ÿþ¥ÿÿÿÿlÿcÿÿT ÿT$ÿT'ÿ,ÿc0ÿl5ÿt8ÿ<ÿAÿDÿ¥Hÿ­Mÿ­Qÿ­Tÿ´Yÿ¥]ÿbÿeÿiÿtnÿtqÿcuÿzÿK~ÿKÿ;ÿ;ÿ3ÿ3ÿ;ÿ;ÿDÿD¢ÿD§ÿK«ÿT®ÿT³ÿc·ÿc¼ÿt¿ÿtÃÿÈÿÌÿÏÿÔÿØÿÛÿàÿäÿéÿtìÿtðÿlõÿlùÿlüÿccccccllc"c&c).T2K7D:;>,C,F#JOSV#[#_,d3g;kDpKsKwT|T T¤©T­T°KµK¹D¾DÁ;Å;Ê3Î3Ñ3Ö,Ú,Ý#âæëîò÷ûþ#3;KKcc$l(l+t0t49<t@tElHcLKQKU;X;];aDfKiTmcrculyl~lltlllcc¢¦T«T¯K²K·D»;À,Ã#ÇÌúÐêÓêØÛÜÛßÒäÊèºí²ðôùaýQ99	IX²âú!3&D*T-2t69>BGJNS¥W¥Z¥_¥c­h­k­o­t¥w¥¡¤¨­±´t¹l½lÂlÅlÉlÎtÒtÕÚÞáæêïòöûÿ#(,/48¥;¥@¥D¥I­L­P­U­Y­­a­e¥j¥m¥q¥v¥y¥¥¥¥­¥¥¥¥¥£¥¦¥ª¥¯¥³¥¶¥»¥¿¥Ä¥ÇËÐÓ×Üàãèìñôøý	!%*.16:=BFKNRW[^cgl¥os¥x ¥¨¬±µ¸¥½¥Á¥Æ¥É¥Í¥Ò¥Õ¥Ù¥Þ¥â¥å¥ê¥î¥ó¥ö¥ú¥ÿ­¥¥¥¥¥¥¥ ¥#',¥0¥3¥&ÿÿÿÿ&ÿÿÿÿ&ÿÿÿÿ;üR"	&ÿÿÿÿ3ÿwi û ÿ"Arialª-ð.	2ä_ÿ14535656&ÿÿÿÿ&ÿÿÿÿ~þÍ'ÿû ÿ"Arial-ð.	2Ïëþ15055656&ÿÿÿÿ&ÿÿÿÿHýR~þûû ÿ"Arialª-ð.	2¿tý15845656&ÿÿÿÿ&ÿÿÿÿ;ü¹"	d%0;üÏ@üÏCüÏGüÏLüÏPü×Sü×Xüàà_üàdüàhüàmü×pü×tü×yüà|üçüçüçü×ü×üÏü×üÏü×¡ü¿¤ü¿©ü×­üÏ²üàµüç¹üÆ¾üÆÁüàÅüçÊüøÎüøÑüðÖüçÚüàÝü×âüÏæüÆéü¶îü®òü÷üúülþülýKýKý3ý3ý#ý#ýý	"ýù'ýù+ýñ0ýù3ýñ7ýñ<ýÐ?ýáCýHýKýmOý]TýXý[ýÈ`ýÁdý¹gýÁlýòpýúuýLxý]|ývýýñýùý#ý*ýcýlýS ýt¥ý©ýt¬ýt±ýtµýlºýl½ýlÁýlÆýtÉýtÍýÒýÖýtÙýtÞýSâýåýtêýtîýñýöýcúýtÿýtþtþþþþþþþ#þ'þ*þ/þ3þ6þ;þt?þlDþlGþKþPþSþWþ`þ¥cþhþ¥lþ¥oþtþ®xþþ®þþ¥þþþ¶þ¶þþ¡þ¥¥þ¨þl­þ±þl´þc¹þ#½þ3ÂþùÅþáÉþùÎþÑþÕþÚþDÝþáþDæþDêþíþòþtöþùþÆþþ¿ÿÿ¶ÿÏÿÏÿ×ÿ×ÿÆÿÆ#ÿ¶&ÿ¶+ÿ/ÿ2ÿ7ÿ;ÿ>ÿCÿGÿLÿOÿSÿ¿Xÿ[ÿ¥_ÿ®dÿ¿hÿ¶kÿ¥pÿ¶tÿÆwÿ¶|ÿ¿ÿÆÿ®ÿÿ®ÿ®ÿÿÿ ÿ¤ÿt©ÿt­ÿK°ÿKµÿ;¹ÿ;¼ÿ3Áÿ3Åÿ*Êÿ;ÍÿÑÿÖÿÙÿtÝÿâÿåÿéÿîÿ¥òÿ®õÿ¶úÿ¥þÿ¿¶¥®¿Æ¶¿¿"¿'+¥.¶3¶7:?CcFKOTW¥[®`cg¶l¶p¿s¿x¿|¿¿¿¶¥ ¶¥®¨Æ¬Æ±ÆµÆ¸Ï½ÆÁÆÄÆÉ¿Í¿Ò¿Õ¿Ù®Þ®áå¥ê®í¶ñ¿ö¶úÆý¿ÆÆ	à×¿Æ×Æ#¿&Æ*à/Æ2¿6¿;Æ?ÏBÆGÆKÏNÏS×WÏÆ_ÆcÆhÆkÏoÏtÏx×ÆÏ¿Æàà××Ï¡à¤Æ¨Æ­Ï°×´Æ¹Æ½×À¿ÅÉÌ¥ÑÕÚÝáæéíò¥õ¥ùþ®®¥¶¿®¶Ï"à&¿+Æ.¿2¿7à:Æ>ÆCÆGÆJÆOÆSÆV¿[®_¥d¥g¥k¥p¥s¥w¥|¥®®¥¿¿ ¥¤Æ©×¬×°Æµà¸Ï¼ÏÁÆÅÆÈ¿Í¿Ñ¶Ô¶Ù®Ý®à¥å¥éîñõúý¥¥®®¿¿"Æ'Ï*Æ.Ï3×6×:Æ?ÏB¿FÏKÏOÏRÏWÏ[Ï^ÏcÏgÏlÆo®sÏxÆ®®×Æ¿¿ÏÏ¿ ¿£×¨¶¬×±×´¿¸à½¿ÀÆÄ¶É¶ÍÆÐÏÕÆÙ¿ÜÆá¿åàèàíçñðö×ùðý×Æç	çøçøðø!ð&ð*ð/ø2ø6ð;ç>øBG×JàNSWÏZç_Æc×f¶k¶oÆt¶w¥¿¥¶¥®¥¿¿¤®¨¿«¶°¿´¿¹Æ¼ÆÀÏÅÏÈÏÌÏÑÏÕÆØ¿Ý¿á¿ä¿é¶í¶ð¶õ¶ù¶þ¶¥¥®¿&ÿÿÿÿ&ÿÿÿÿ&ÿÿÿÿ&ÿÿÿÿGþSL6	ûpÿ"Arial-ð.	2ìsþRaman Shift / cmhPxPP(`P (((((Hxû ÿ"Arialª-ð	2ÁÃ-1 5&ÿÿÿÿ&ÿÿÿÿõúôþØûlûpÿ"Arial-ð.	28û	Intensity(P(PPH (H&ÿÿÿÿ&ÿÿÿÿ>üD	úÿÿÿ"--ðû¼"Systemn-ð²Dj>ü	ú"-@ó:--ð'ÿÿ&ÿÿÿÿ&ÿÿÿÿ(ý0ýS--SÐýü	ú"-É(ý(ý--ð'ÿÿ&ÿÿÿÿ&ÿÿÿÿwü§þûxÿ"Arialª-.	2¾Îü 1600 &KLLK&&ÿÿÿÿ&ÿÿÿÿóþûþS---ðSÿSþ	ú"-Éóþóþ--ð'ÿÿ&ÿÿÿÿ&ÿÿÿÿBþrûxÿ"Arialª-.	2¾þ 1500 &KLLK&&ÿÿÿÿ&ÿÿÿÿ¾ÆS---ðSf	ú"-É¾¾--ð'ÿÿ&ÿÿÿÿ&ÿÿÿÿ=ûxÿ"Arialª-.	2¾d 1400 &KLLK&&ÿÿÿÿ&ÿÿÿÿS---ðS/ç	ú"-É--ð'ÿÿ&ÿÿÿÿ&ÿÿÿÿÖûxÿ"Arialª-.	2¾- 1300 &KLLK&&ÿÿÿÿ&ÿÿÿÿRZS---ðSú²	ú"-ÉRR--ð'ÿÿ&ÿÿÿÿ&ÿÿÿÿ¡Ñûxÿ"Arialª-.	2¾ø 1200 &KLLK&&ÿÿÿÿ&ÿÿÿÿ>üøD	ú"-%>ü<<ø>üø>ü&ÿÿÿÿ&ÿÿÿÿ&ÿÿÿÿÅùøH#úûXÿ"Arial-ð.	2½ù(a)8]8&ÿÿÿÿ&ÿÿÿÿÅ³üHÝýûXÿ"Arialª-ð.	2wý(b)8]8&ÿÿÿÿ&ÿÿÿÿÊD+ûXÿ"Arial-ð.	2Å!(c)8T8&ÿÿÿÿ&ÿÿÿÿÅHÁûXÿ"Arialª-ð.	2[(d)8]8&ÿÿÿÿ&ÿÿÿÿ&TNPP&ÿÿÿÿ--ð-ð
Figure S5. Surface-enhanced resonance Raman spectrum of: (a)  1-; (b) 2-; (c) 3-; (d) 4-  in methanol reduced at roughened silver electrode. exc.= 514.5 nm, 20 mW.
üÙýüÐýüèýüèýüèýüèýüèýüèýüÙý¡üèý¥üáýªüáý­üèý±üáý¶üèýºüñý½üñýÂüñýÆüèýÉüáýÎüèýÒüèý×üÙýÚüÙýÞüÙýãüÙýæüÉýêüÉýïüÉýóüÉýöüÐýûüÐýÿüÀýýÀýýÉýýÐýýÐýýÐýýÐýýÉýýÀý#ý¸ý(ýÉý,ýÉý/ý¨ý4ý¸ý8ý¨ý=ýÀý@ý±ýDý±ýIýÉýLýÉýPýÀýUýÙýYýÉýÉýaýÙýeýÙýhýÀýmý¸ýqýÀývýÀýyýÉýýÉýýÙýýÐýýÀýýÀýýÐýýÀýýÐýýÐý¡ýáý¦ýÙýªýÐý¯ýÐý²ýÉý¶ýÀý»ýÐý¿ýÙýÂýÐýÇýÉýËýÐýÎýÙýÓýÀý×ýÐýÜýÉýßýÐýãýÉýèýÉýëýÉýïýÉýôýÀýøýÐýûýÀýþÉýþáýþÙýþÐýþÐýþÙýþÙýþÀý!þÐý$þÉý(þÉý-þÙý1þÐý4þÉý9þÉý=þÐýBþÐýEþÙýIþÙýNþÐýQþÐýUþáýZþÐý^þáýaþñýfþáýjþáýmþÐýrþÙývþñýþèý~þÙýþÐýþáýþÙýþèýþèýþáýþáýþèý£þÙý¦þáý«þáý¯þÙý´þÙý·þáý»þèýÀþáýÄþáýÇþÙýÌþÐýÐþÙýÓþÐýØþÉýÜþÀýáþ±ýäþ¸ýèþÐýíþÐýðþÐýôþÙýùþÐýýþÙýÿÐýÿÐý	ÿÉýÿÉýÿÀýÿÀýÿ¸ýÿÀý!ÿ±ý&ÿ±ý)ÿ¸ý-ÿ¸ý2ÿÐý6ÿÐý9ÿÀý>ÿÉýBÿÀýGÿÀýJÿÉýNÿÉýSÿÐýVÿÐýZÿÀý_ÿ¸ýcÿÙýfÿÐýkÿÙýoÿÙýrÿÉýwÿÙýÿÀýÿÀýÿÐýÿÀýÿÉýÿÐýÿÙýÿÙýÿÐýÿÉý¤ÿÙý¨ÿÐý«ÿÀý°ÿÀý´ÿ±ý¹ÿ±ý¼ÿ¨ýÀÿ ýÅÿýÉÿýÌÿ`ýÑÿ`ýÕÿOýØÿHýÝÿ.ýáÿ.ýæÿOýéÿWýíÿoýòÿoýõÿýùÿýþÿ¨ý¨ý ýý ýý¨ýýý"ý&ý+xý.gý2`ý7gý;gý>OýCOýG7ýL7ýOýSýX÷ü[÷ü_ÎüdÎüh­ük¦üpütüw¾ü|¾üÝüæüýý'ý'ý`ýgý¡ý¤ý© ý­ ý°±ýµ¨ý¹ ý¾¨ýÁ¸ýÅ¸ýÊÀýÎ¸ýÑÐýÖÉýÚÉýÝ¨ýâÀýæÀýëÐýîÉýòÀý÷ÀýúÙýþÐýÀýÀýÙýÙýÉý¸ýáýÙý$Éý'Éý+èý0èý3áý7áý<Ðý@ÐýCÐýHÉýLÐýQÉýTÉýXÐý]Àý`ÀýdÀýiÀýmÉýpÉýuÙýyÙý|áýáýáýáýáýáýÐýÐýÙý¢Ùý¦áý©èý®áý²áýµÙýºáý¾ÐýÃÙýÆÐýÊÙýÏÐýÓáýÖÙýÛÐýßáýâÙýçÉýëÙýðÉýóÀý÷ýüýÿýýWý`ýgý`ýgýgý `ý$gý)ý,ý0¨ý5 ý8¨ý< ýA¸ýEÀýH¸ýM¸ýQÀýVÀýYÀý]Éýb¸ýeÀýiÀýn¸ýrÀýuÉýzÀý~¸ýÀýÉýÀýÀýÉýÉýÉýÀý¢Éý§Ðý«Àý®¸ý³Éý·Éýº¸ý¿ÉýÃ¸ýÈ¸ýËÉýÏÉýÔÀýØÀýÛÉýàÐýäÉýçÉýìÉýðÉýõÐýøÉýüÐýÐýÉýÐýáýáýÐýÐýÙý áý%Ðý)Ðý.Ðý1Ðý5Éý:Éý=ÉýAÉýFÀýJÉýM¸ýR±ýVÐý[Éý^ÉýbÀýgÉýjÉýnÐýsÐýwÙýzÉýÐýÙýáýáýÐýèýÙýáý Ðý£Ùý§èý¬èý°Ùý³Ùý¸áý¼áý¿ÙýÄÙýÈÐýÍÐýÐÙýÔÙýÙáýÝÐýàÙýåÙýéÐýìÐýñÙýõáýúÙýýÐýÐýÉý	ÙýÙýÙýÙýáýáý"èý%èý*áý.áý3Ùý6Ùý:áý?áýBèýFèýKÙýOÙýRÐýWáý[èý`ÙýcèýgèýlÙýoáýsèýxèý|ÙýáýÙýÙýáýáýáýÙýáý Ùý¥Ùý¨Ùý¬Éý±ÙýµÙý¸Ðý½áýÁáýÄÐýÉÐýÍÙýÒáýÕÐýÙÙýÞáýâÙýåÐýêÙýîÉýñÐýöÙýúÉýÿÙýÐýÉýÉýÙý&ÿÿÿÿ&ÿÿÿÿ&ÿÿÿÿ'ü8ÿ õ&ÿÿÿÿéüEýû ÿzz"Arial©-ð.	2IWý15915656&ÿÿÿÿ&ÿÿÿÿ¸þNgÿû ÿ"Arial@-ð.	2P*ÿ14865656&ÿÿÿÿ&ÿÿÿÿÿqÿ6©û ÿzz"Arial©-ð.	2uõÿ14405656&ÿÿÿÿ&ÿÿÿÿU8ÿþnû ÿ"Arial@-ð.	2:Â14085656&ÿÿÿÿ&ÿÿÿÿQõÿú+û ÿ"Arial©-ð.	2÷¾13455656&ÿÿÿÿ&ÿÿÿÿÖiÿû ÿ"Arial@-ð.	2kC13155656&ÿÿÿÿ&ÿÿÿÿ'ü7 õd%0'üÝ,üÝ0üÝ3üí8üä<üíAüäDüÝHüäMüÝQüíTüÝYüÝ]üä`üíeüäiüÝnüÕqüíuüÝzüÝ~üÕüÕüÝüÝüÕüÌüÕüÌüÕ¢üÝ§üÌ«üÌ®üÕ³üÝ·üäºüÝ¿üÝÃüÝÈüÝËüÝÏüÕÔüäØüÝÛüÌàüÝäüÌéüÝìüÕðüÕõüÌøü¼üüÅýÌýÅý¼ýÅý¼ý´ýý"ý%ý)ýk.ýk2ýS5ýS:ýc>ýkCýcFýkJýOýRýVý[ý_ý¤býgýký¤pý¤sýwý|ý´ýý¤ý¤ý´ý¼ýÅýÅý¼ ýÅ¤ýÝ©ýÝ­ýÌ°ýÅµýÝ¹ýä¼ý¼ÁýÅÅýÝÊýÌÍýÕÑýÕÖýÕÚýÕÝýÝâýÝæýÝëýÝîýÕòýÕ÷ýäúýÕþýÝþÕþÌþÝþÌþÕþÌþÕþ¼$þ´'þÌ+þÌ0þÅ4þÅ7þÝ<þÌ@þÅEþ¼HþÅLþÌQþÅTþÕXþ¼]þÕaþÕdþÕiþÕmþÕrþÝuþÝyþÝ~þÝþÝþÕþäþíþÝþäþÝþÕ¢þä¦þÝ«þÝ¯þÝ²þí·þÕ»þÝ¾þÝÃþÌÇþÕÌþÝÏþäÓþÕØþÕÜþÕßþÕäþÌèþÕëþÅðþÅôþ´ùþ´üþ¤ÿÿ	ÿÿcÿkÿcÿÿt!ÿk&ÿ)ÿ-ÿ2ÿ6ÿ­9ÿ­>ÿ¤BÿGÿ¤Jÿ­Nÿ­Sÿ­VÿZÿ_ÿcÿfÿkÿoÿtÿwÿtÿtÿÿtÿÿÿÿÿÿ¡ÿ¤ÿ¨ÿ­ÿ±ÿt´ÿt¹ÿ½ÿÀÿÅÿSÉÿ;Îÿ3ÑÿÕÿúÚÿÊÞÿÁáÿæÿyêÿíÿ¢òÿÊöÿÊûÿâþÿêúúúêâ#º(±+/4`8X;@@@D7I7LHPHU`Xiyaehm±q±vy©±±©©ÊÊÙâ£¦ª#¯3³3¶S»S¿kÂkÇËÐ­Ó­×´Ü¼à¤ã­èÌìÕïÌôÌøÌýÕÝÕ	ÌÌäÝäÝ!Ì%Ì*¼-´1Å6Å:´=´BFKNRWZ^cgjtotscxcSS33ú ú¥¨¬3±3µS¸S½ÁcÄtÉtÍÒkÕÙÞtâåêîñökúcÿD;ÙÒ©¢p#`',/Ê3Ù8<?3D3HSMPcTkY`eilq¤u´z­´­´ÅÅÌ¼Å¼¢Ì§ÕªÅ®Ý³Ì·ÌºÌ¿ÌÃÝÆÕËÌÏÅÔÌ×ÌÛÅàÌä¼çÅì¼ðÅó¼øÅü¼Å¼¼´´¼¼´ ´%¼)¼.¼1´5­:´>ÅA´FÅJÅOÌRÌVÌ[Å^ÅbÅgÕkÌnÌsÕwÅ|ÌÅ¼ÌÕÅÌ¼¼ Ì¤Ì©¼¬Ì°ÅµÅ¸¼¼ÅÁÌÅÕÈ´Í´Ñ¼Ö´Ù¼Ý¼âÅæÕéÅîÕò¼õÅúÕþÝÌÌÝÝÌÌÕÕ"Ý'Ý+Õ0Õ3Ý7Ì<Õ@ÕCÕHÕLÌQÕTÌXÕ]Ì`ÌdÅi¼mÅpÅu¼y´~´´¤¤¢¤¦«®²·º¾ÃÇÊÏ¤ÓØÛßäèëðô÷ü&ÿÿÿÿ&ÿÿÿÿ&ÿÿÿÿ'üWK&ÿÿÿÿÐ$û ÿ"Arial©-ð.	2èÆ13165656&ÿÿÿÿ&ÿÿÿÿHÃ~lû ÿ"Arial@-ð.	20t14015656&ÿÿÿÿ&ÿÿÿÿåÿWû ÿ"Arial©-ð.		2ÄS@&ÿÿÿÿ&ÿÿÿÿYÿ9û ÿ"Arial@-ð.	2Æÿ14465656&ÿÿÿÿ&ÿÿÿÿíþÿÒû ÿ"Arial©-ð.	2Zÿ14775656&ÿÿÿÿ&ÿÿÿÿìüÉýÿû ÿ"Arial@-ð.	2ËYý15925656&ÿÿÿÿ&ÿÿÿÿ'üûKd%0'ü:,ü)/ü"3ü28ü2<ü:?ü2Dü:Hü:Kü2Pü)Tü"Yü")`ü)eü)hü)lü)qü)tü)xü)ü"ü"ü)ü)ü)ü"ü2ü)ü2¡ü2¥ü:ªü:­ü2±ü2¶ü:ºü2½ü)Âü2Æü)Éü2Îü:Òü2Õü2Úü)Þü:ãü2æü2êü:ïü2òü2öü)ûü)ÿü2ý2ý)ý2ý)ý)ý)ý"ý#ý(ý+ý/ýù4ýù7ý;ý@ýðDýðGýLýPýSýXýaý"dý"hý)mý"pý)tý)yý"|ý"ý)ý"ý)ý)ý"ý"ý2ý2¡ý2¦ý2©ý2­ý2²ý)µý)¹ý)¾ý2Âý)Åý)Êý2Îý2Ñý2Öý2Úý2Ýý)âý)æý)ëý:îý:òý2÷ý2úý)þý)þ)þ)þ)þ)þ2þ2þ)þ)"þ2'þ2+þ)0þ)3þ:7þ:<þ:?þ:Cþ:Hþ:LþCOþ:Tþ2Xþ:[þ:`þ:dþ2iþ:lþ2pþ:uþ:xþ:|þ2þ2þ)þ)þ)þ)þ"þ"þ" þ¥þ©þ®þ"±þµþ"ºþ)½þ2Áþ:Æþ2Éþ2Íþ)Òþ)Öþ)Ùþ)Þþ"âþ"åþêþîþóþöþ"úþ"ÿþÿ"ÿÿÿÿÿÿÿð#ÿé'ÿØ*ÿØ/ÿÈ3ÿÈ8ÿ·;ÿ®?ÿ®Dÿ®GÿÈKÿÈPÿÏTÿÏWÿØØ`ÿécÿéhÿùlÿùqÿðtÿðxÿùÿùÿùÿùÿéÿéÿàÿØÿ®ÿ§¡ÿ¥ÿu¨ÿK­ÿD±ÿ¶ÿ¹ÿ½ÿÂÿ,Åÿ,Éÿ;ÎÿDÑÿTÕÿTÚÿlÞÿláÿuæÿlêÿeíÿeòÿöÿûÿKþÿD;3ÐÉ#N&E+/2û7;4@=CvGvL¯OÀSÐXÙê_ñdhkñpñtñwñ|ÉÀv¸Àê¡ñ¤©#­T°µ¹¾§Á®ÅÏÊÏÍØÑØÖðÙùÝðâéæéùîòõúþ"'+.37:?CHKOTW[`dglpsx| ¥©¬±µ¸½ÁÆÉÍÒÕÙÞáåùêùîùñéöéúÈý¿K;,;el#&*·/¿3à6é;é?éBGKPSW_chlotx¡¤¨­±´¹½ÀÅÉÌÑÕÚÝáæéíòöùþ"&+".27";">"C)G)J)O)S)X2[)_2d2g"k"p)t)w"|"22:2:222 2¤2©:¬:°:µ:¹:¼:Á:Å2È:Í:ÑCÔCÙ:Ý:â2å:é2î2ñ2õ2ú:þ:22::2::2")')*).)3"6):)?)C2F)K"O2R"W["`"c"g"l"o"s"x"" ¥¨¬±´ù¸ù½ðÁðÄàÉàÍÏÐÈÕ¿Ù¿Ü·á¿å·ê·í®ñ®ö¿ù·ý¿¿Ø&ÿÿÿÿ&ÿÿÿÿ&ÿÿÿÿ#þS(6	ûpÿ"Arial©-ð.	2ìOþRaman Shift / cmhPxPP(`P (((((Hxû ÿ"Arial@-ð	2Á-1 5&ÿÿÿÿ&ÿÿÿÿÑúôþ´ûlûpÿ"Arial©-ð.	28jû	Intensity(P(PPH (H&ÿÿÿÿ&ÿÿÿÿü 	úÿÿÿ"--ðû¼"Systemn-ð² jü	ú"-ó--ð'ÿÿ&ÿÿÿÿ&ÿÿÿÿýýS--S¬ýdü	ú"-Éýý--ð'ÿÿ&ÿÿÿÿ&ÿÿÿÿSüþûxÿ"Arial©-.	2¾ªü 1600 &KLLK&&ÿÿÿÿ&ÿÿÿÿÏþ×þS---ðSwÿ/þ	ú"-ÉÏþÏþ--ð'ÿÿ&ÿÿÿÿ&ÿÿÿÿþNûxÿ"Arial©-.	2¾uþ 1500 &KLLK&&ÿÿÿÿ&ÿÿÿÿ¢S---ðSBúÿ	ú"-É--ð'ÿÿ&ÿÿÿÿ&ÿÿÿÿéÿûxÿ"Arial©-.	2¾@ 1400 &KLLK&&ÿÿÿÿ&ÿÿÿÿckS---ðSÃ	ú"-Écc--ð'ÿÿ&ÿÿÿÿ&ÿÿÿÿ²âûxÿ"Arial©-.	2¾	 1300 &KLLK&&ÿÿÿÿ&ÿÿÿÿ.6S---ðSÖ	ú"-É..--ð'ÿÿ&ÿÿÿÿ&ÿÿÿÿ­ûxÿ"Arial©-.	2¾Ô 1200 &KLLK&&ÿÿÿÿ&ÿÿÿÿüø 	ú"-%üøüøü&ÿÿÿÿ&ÿÿÿÿø¥ùûXÿ"Arial@-ð.	2?ùÔ(a)8]8&ÿÿÿÿ&ÿÿÿÿ5ü_ýûXÿ"Arial©-ð.	2ùüÔ(b)8]8&ÿÿÿÿ&ÿÿÿÿÿü­ûXÿ"Arial@-ð.	2GÙ(c)8T8&ÿÿÿÿ&ÿÿÿÿCûXÿ"Arial©-ð.	2ÝÔ(d)8]8&ÿÿÿÿ&ÿÿÿÿ&TNPP&ÿÿÿÿ--ð-ð`ÀÀ
Figure S6. TR3 spectra of: (a)  5; (b) 6; (c) 7; (d) 8  in CH2Cl2 solution (1 mM), exc.= 448.3 nm pulsed excitation, laser energy 3 mJ per pulse.
